# Supplementary material for: An oocyte meiotic midbody cap is required for developmental competence in mice
Source: Nat Commun. 2023 Nov 16;14:7419. doi: 10.1038/s41467-023-43288-x (PMC10654508; doi:10.1038/s41467-023-43288-x)
Supplement: Supplementary file 11 — Source Data [file 41467_2023_43288_MOESM11_ESM.xlsx]

## Sheet: Figure 1
Figure 1d					Figure 1f					Figure 1h
PRC1					MKLP2					MKLP1
Distance_(microns)	PRC1	MT			Distance_(microns)	MKLP2	MT			Distance_(microns)	MKLP1	MT
0	35	168			0	962	1472			0	203	1542
0.0813	38.287	197.967			0.06313	843.799	1366.31			0.0631	167.832	1608.33
0.1626	42.278	185.855			0.12626	1061.85	1671.52			0.1263	214.699	1733.63
0.2438	49.692	166.155			0.18939	812.277	728.849			0.1894	249.065	2039.19
0.3251	44.139	200.774			0.25253	903.44	1345.48			0.2525	186.147	1602.28
0.4064	42.96	206.54			0.31566	973.094	1221.87			0.3157	205.913	1658.41
0.4877	42.818	192.633			0.37879	1097.96	950.071			0.3788	180.003	1623.72
0.5689	42.885	202.339			0.44192	1109.29	1578.16			0.4419	190.546	1651.24
0.6502	41.823	191.179			0.50505	919.06	1327.87			0.5051	117.452	1690.44
0.7315	38.162	169.458			0.56818	1086.14	1280.45			0.5682	217.258	1760.56
0.8128	39.076	156.584			0.63131	857.831	1599.86			0.6313	244.052	1609.27
0.894	43.483	222.437			0.69445	837.946	1199.04			0.6944	241.658	1721.63
0.9753	41.81	177.395			0.75758	974.455	918.217			0.7576	140.944	1561.7
1.0566	36.745	174.335			0.82071	840.645	1028.67			0.8207	125.801	1722.74
1.1379	46.889	192.36			0.88384	680.878	1292.01			0.8838	149.647	1728.44
1.2191	35.488	184.68			0.94697	736.911	899.417			0.947	199.214	1762.16
1.3004	35.073	193.618			1.0101	997.017	1307.98			1.0101	175.25	1678.93
1.3817	43.543	167.59			1.07323	1211.2	1332.82			1.0732	171.512	1482.97
1.463	40.387	156.848			1.13637	1016.88	868.984			1.1364	205.618	1606.73
1.5442	50.51	195.296			1.1995	864.365	1169.35			1.1995	223.52	1829.28
1.6255	51.178	193.067			1.26263	1090.51	1171.82			1.2626	212.682	1771.34
1.7068	59.549	167.668			1.32576	978.003	1005.95			1.3258	279.456	1785.69
1.7881	54.961	191.803			1.38889	1025.01	1512.57			1.3889	184.115	1689.21
1.8693	41.288	208.843			1.45202	856.721	1210.21			1.452	178.483	1499.24
1.9506	34.835	171.671			1.51515	998.651	1286.46			1.5152	191.029	1578.28
2.0319	44.421	169.601			1.57829	958.744	1133.88			1.5783	250.079	1592.29
2.1132	55.738	173.023			1.64142	1132.32	1374.07			1.6414	121.361	1577.84
2.1944	46.203	184.244			1.70455	1410.43	1451.45			1.7045	132.877	1650.8
2.2757	49.648	162.946			1.76768	1409.08	1377.38			1.7677	174.633	1710.29
2.357	49.945	143.434			1.83081	1547.4	1390.32			1.8308	184.602	1526.9
2.4383	54.921	158.725			1.89394	1567.64	976.854			1.8939	169.137	1717.09
2.5195	49.229	194.035			1.95707	1518.74	1772.62			1.9571	146.333	1732.33
2.6008	49.692	176.782			2.02021	1395.99	1437.17			2.0202	154.813	1654.1
2.6821	37.937	176.398			2.08334	1354.96	1529.85			2.0833	170.911	1498.47
2.7634	48.594	149.527			2.14647	1250.89	1287.4			2.1465	199.438	1392.43
2.8446	44.057	169.502			2.2096	1236.51	1299.15			2.2096	192.368	1369.08
2.9259	52.969	176.982			2.27273	1340.69	1604.89			2.2727	244.43	1421.52
3.0072	53.724	149.777			2.33586	1695.57	1342.92			2.3359	283.749	1483.73
3.0885	47.755	150.454			2.39899	2000.6	1447.29			2.399	253.839	1335.2
3.1697	45.475	164.222			2.46213	1842.3	1461.94			2.4621	208.746	1310.04
3.251	45.037	156.702			2.52526	1815.36	1241.69			2.5253	152.057	1365.33
3.3323	48.153	150.147			2.58839	1277.91	1124.51			2.5884	189.32	1607.04
3.4136	46.181	146.64			2.65152	1444.38	1027.12			2.6515	349.048	1656.06
3.4948	54.193	142.073			2.71465	1899.48	873.438			2.7147	259.584	1866.62
3.5761	65.212	131.722			2.77778	1799.25	1148.34			2.7778	233.171	1723.46
3.6574	57.217	141.746			2.84091	1799.16	1285.57			2.8409	251.173	1788.07
3.7387	55.153	170.383			2.90405	1562.54	1355.52			2.904	245.373	2028.15
3.8199	60.834	141.785			2.96718	1658.6	1187.93			2.9672	271.201	1650.07
3.9012	57.223	131.035			3.03031	1929.7	993.904			3.0303	251.506	1719.29
3.9825	55.133	133.34			3.09344	1986.28	1188.3			3.0934	317.949	1432.36
4.0638	58.685	122.408			3.15657	1874.45	1505.48			3.1566	300.165	1622.37
4.145	53.134	117.951			3.2197	1890.09	1369.28			3.2197	202.08	1442.38
4.2263	58.8	138.375			3.28283	1877.75	1063.44			3.2828	219.074	1645.63
4.3076	49.537	150.341			3.34597	1945.54	1110.38			3.346	190.904	1855.64
4.3889	39.885	167.171			3.4091	2004.61	1092.29			3.4091	182.161	1636.38
4.4701	45.617	178.668			3.47223	2013.12	1009.26			3.4722	204.726	1718.41
4.5514	62.237	156.101			3.53536	2489.32	1025.68			3.5354	248.956	1709.71
4.6327	67.866	140.829			3.59849	2623.53	944.18			3.5985	236.636	1684.72
4.714	61.354	166.389			3.66162	2592.24	1150.16			3.6616	214.283	1697.67
4.7953	67.378	151.877			3.72475	2539.43	1001.8			3.7248	241.304	1869.54
4.8765	61.82	153.312			3.78789	2341.16	950.797			3.7879	302.088	1860.98
4.9578	82.376	164.763			3.85102	2326.72	964.808			3.851	336.301	1874.82
5.0391	90.805	147.137			3.91415	2494.07	861.681			3.9141	317.667	1710.67
5.1204	86.154	157.853			3.97728	2092.03	775.368			3.9773	330.022	1712.2
5.2016	106.47	137.444			4.04041	1662.93	687.248			4.0404	442.46	1727.14
5.2829	109.007	125.76			4.10354	1408.79	643.656			4.1035	534.4	1821.27
5.3642	113.339	163.968			4.16667	1515.04	644.787			4.1667	644.388	2046.15
5.4455	129.423	146.732			4.22981	1391.36	668.248			4.2298	824.977	2017.19
5.5267	154.089	134.26			4.29294	1276.59	456.48			4.2929	849.933	1742.16
5.608	171.417	157.458			4.35607	1306.11	400.881			4.3561	973.537	2161.84
5.6893	188.146	144.217			4.4192	1424.03	487.646			4.4192	1241.71	2204.69
5.7706	192.454	145.602			4.48233	1362.83	403.147			4.4823	1549.85	2081.02
5.8518	170.453	169.287			4.54546	899.994	394.752			4.5455	1658.88	2145.55
5.9331	187.606	168.483			4.60859	772.004	443.085			4.6086	1908.29	1906.65
6.0144	180.889	169.693			4.67173	594.988	304.25			4.6717	2189.86	1747.75
6.0957	165.454	142.517			4.73486	440.31	341.828			4.7349	2052.93	1873.29
6.1769	171.37	137.238			4.79799	460.447	326.87			4.798	1951.15	1880.19
6.2582	163.321	124.782			4.86112	445.212	296.469			4.8611	1970.45	1670.5
6.3395	181.9	126.815			4.92425	509.324	340.731			4.9243	1735.2	1572.05
6.4208	189.906	128.952			4.98738	595.667	307.225			4.9874	1669.53	1381.56
6.502	176.941	136.172			5.05052	618.063	377.119			5.0505	1702.52	1713.3
6.5833	193.237	164.48			5.11365	663.146	422.354			5.1136	1387.89	1513.02
6.6646	212.207	173.734			5.17678	831.224	419.407			5.1768	1389.19	1551.9
6.7459	204.853	161.876			5.23991	1136.65	515.405			5.2399	1327.28	1502.02
6.8271	178.413	147.418			5.30304	1280.6	593.633			5.303	1084.92	1436.97
6.9084	161.042	140.137			5.36617	1215.11	827.987			5.3662	968.493	1563.97
6.9897	178.029	135.785			5.4293	1148.52	1023.83			5.4293	1137.7	1434.07
7.071	189.94	147.02			5.49243	1172.4	835.08			5.4924	1218.97	1309.48
7.1522	171.056	151.087			5.55557	1391.27	982.985			5.5556	1256.81	1223.72
7.2335	177.994	143.736			5.6187	1620.32	1099.69			5.6187	1349.41	1259.51
7.3148	184.86	137.71			5.68183	1591.92	1089.3			5.6818	1748.98	1226.72
7.3961	186.376	122.087			5.74496	1471.62	1158.39			5.745	1654.37	1071.35
7.4773	208.266	103.75			5.80809	1760.63	1346.19			5.8081	1585.57	1158.46
7.5586	233.286	95.615			5.87122	1311.96	1477.03			5.8712	1381	1275
7.6399	246.916	96.766			5.93436	1246.39	1607.97			5.9344	1662.74	1169.35
7.7212	252.883	97.796			5.99749	1203.75	1368.58			5.9975	1612.38	1431.9
7.8024	255	84.977			6.06062	1122.65	1166.1			6.0606	1662.39	1399.03
7.8837	246.902	70.969			6.12375	1304.08	1064.13			6.1237	1489.71	1094.78
7.965	213.618	70.995			6.18688	1165.03	960.125			6.1869	1491.35	1027.66
8.0463	183.191	72.303			6.25001	1164.9	1119.07			6.25	1660.36	1031.16
8.1275	169.337	72.461			6.31314	1008.05	1168.61			6.3131	1575.89	1135.96
8.2088	174.113	79.073			6.37628	1043.62	1108.33			6.3763	1359.81	1172.06
8.2901	169.194	78.582			6.43941	1061.66	1080.31			6.4394	1269.22	912.349
8.3714	160.37	88.596			6.50254	860.838	1105.98			6.5025	1447.45	884.611
8.4526	193.807	99.123			6.56567	682.635	1435.46			6.5657	1545.43	877.911
8.5339	200.245	95.659			6.6288	811.464	1178.66			6.6288	1530.58	1072.4
8.6152	214.74	102.386			6.69193	953.995	1043.34			6.6919	1328.95	1229.64
8.6965	254.701	106.251			6.75506	1140.16	1371.4			6.7551	1459.55	941.849
8.7777	253.882	108.716			6.8182	997.598	1253.99			6.8182	1315.26	974.564
8.859	216.897	105.169			6.88133	1181.23	1189.77			6.8813	1196.95	1089.43
8.9403	151.067	101.529			6.94446	1077.91	854.271			6.9445	982.282	1205.05
9.0216	128.94	102.976			7.00759	720.765	840.633			7.0076	966.003	1067.31
9.1028	126.059	99.802			7.07072	989.017	706.514			7.0707	881.538	1167.32
9.1841	92.288	93.7			7.13385	1142.35	758.385			7.1339	838.043	1227.02
9.2654	72.214	98.202			7.19698	658.436	931.708			7.197	1004.36	1419.54
9.3467	72.493	93.739			7.26012	891.738	1077.85			7.2601	991.222	1261.09
9.428	68.429	80.124			7.32325	1102.36	1043.24			7.3232	1135.01	1438.32
9.5092	59.063	86.916			7.38638	1069.34	1004.57			7.3864	1095.02	1561.72
9.5905	64.281	104.72			7.44951	1290.74	1022.49			7.4495	1086.15	1494.37
9.6718	63.512	109.46			7.51264	1278.32	1223.88			7.5126	1025.43	1292.98
9.7531	65.669	116.726			7.57577	1007.13	1116.29			7.5758	1084.45	1650.28
9.8343	61.635	141.571			7.6389	1041.58	1213.32			7.6389	1139.32	2168.9
9.9156	65.896	116.624			7.70204	1064.32	1415.5			7.702	1174.72	2291.97
9.9969	57.022	98.098			7.76517	1045.05	1351.79			7.7652	1299.76	2310.54
10.0782	56.319	100.241			7.8283	989.621	787.608			7.8283	1590.33	1922.67
10.1594	50.058	99.526			7.89143	1480.88	1025.95			7.8914	1782.19	1811.18
10.2407	50.221	99.37			7.95456	1109.83	1213.33			7.9546	1735.8	1863.18
10.322	50.208	96.894			8.01769	1369.94	1120.15			8.0177	1308.54	1849.86
10.4033	42.223	102.714			8.08082	1169.37	945.285			8.0808	1286.43	1647.4
10.4845	43.963	115.393			8.14396	1304.47	924.417			8.144	1047.78	1465.74
10.5658	51.685	105.605			8.20709	1392.34	1031.5			8.2071	802.811	1527.46
10.6471	55.362	113.138			8.27022	1001.28	1104.95			8.2702	772.041	1347.99
10.7284	57.426	91.479			8.33335	782.957	1356.01			8.3334	534.22	1622.54
10.8096	53.676	108.996			8.39648	781.36	1154.3			8.3965	484.4	1542.2
10.8909	56.979	128.875			8.45961	831.133	1032.06			8.4596	435.128	1371.54
10.9722	50.71	108.207			8.52274	829.71	693.622			8.5227	489.772	1375.25
11.0535	52.704	98.166			8.58588	797.441	943.751			8.5859	306.369	1563.91
11.1347	50.964	110.994			8.64901	1119.74	1491.02			8.649	321.133	1360.26
11.216	40.118	120.225			8.71214	1241.54	1105.63			8.7121	269.903	1563.66
11.2973	44.427	124.573			8.77527	1407.71	941.595			8.7753	224.926	1476.72
11.3786	56.208	94.931			8.8384	1149.94	1175.98			8.8384	230.049	1208.29
11.4598	46.573	105.773			8.90153	1275.09	895.963			8.9015	292.203	1426.59
11.5411	49.621	127.106			8.96466	1423.13	1011.99			8.9647	240.876	1468.92
11.6224	43.293	132.876			9.0278	877.364	963.484			9.0278	234.075	1243.81
11.7037	50.939	126.768			9.09093	1145.42	1399.47			9.0909	238.097	1356.18
11.7849	45.577	120.585			9.15406	662	243			9.1541	293.973	1361.64
11.8662	43.832	127.717								9.2172	289.044	1271.17
11.9475	48.481	107.863								9.2803	283.631	1209.98
12.0288	50.942	108.251								9.3435	237.2	1347.29
12.11	37.929	96.167								9.4066	209.239	1419.49
12.1913	33.702	93.803								9.4697	224.511	1414.72
12.2726	51.007	97.642								9.5328	227.495	1297.09
12.3539	47.519	95.751								9.596	202.363	1407.34
12.4351	44.168	102.013								9.6591	225.749	1316.9
12.5164	50.84	112.311								9.7222	207.246	1421.36
12.5977	39.896	106.017								9.7854	191.667	1121.67
12.679	51.73	99.285								9.8485	241.715	1200.42
12.7602	48.829	113.326								9.9116	247.266	1187.09
12.8415	42.549	125.264								9.9748	270.215	1224.19
12.9228	44.176	99.978								10.0379	234.001	1327.76
13.0041	45.46	94.496								10.101	217.335	1355.8
13.0853	47.274	115.445								10.1642	272.344	1147.66
13.1666	44.575	106.276								10.2273	249.158	1436.92
13.2479	40.92	116.03								10.2904	222.678	1643.25
13.3292	36.686	117.329								10.3536	197.764	1427.14
13.4104	37.012	104.906								10.4167	187.645	1313.69
13.4917	49.465	123.329								10.4798	169.989	1338.83
13.573	52.141	130.696								10.543	179.148	1214.94
13.6543	42.587	110.464								10.6061	185.795	1194.27
13.7355	47.041	109.686								10.6692	270.106	1223.22
13.8168	44.668	100.611								10.7323	203.042	1252.88
13.8981	42.981	118.463								10.7955	221.645	1358.46
13.9794	54.589	103.973								10.8586	236.658	1152.92
14.0607	43.081	103.933								10.9217	174.071	1232.81
14.1419	51.943	101.306								10.9849	181.065	1639.73
14.2232	49.875	102.147								11.048	215.89	1320.3
14.3045	61.358	110.343								11.1111	201.797	1352.47
14.3858	58.83	102.435								11.1743	172.892	1304.91
14.467	44.576	95.581								11.2374	218.072	1434.17
14.5483	53.519	114.443								11.3005	203.739	1457.45
14.6296	46.398	107.387								11.3637	209.799	1612.22
14.7109	48.423	107.394								11.4268	198.129	1328.93
14.7921	47.388	148.05								11.4899	216.492	1129.39
14.8734	37.582	144.844								11.5531	212.234	1338.32
14.9547	35.843	115.361								11.6162	225.832	1452.65
15.036	40.482	131.266								11.6793	234.684	1224.77
15.1172	39.963	118.535								11.7424	271	1624
15.1985	40.642	128.895
15.2798	41.114	125.579
15.3611	37.34	117.573
15.4423	41.998	127.359
15.5236	50.368	102.167
15.6049	52.14	122.221
15.6862	48	110

## Sheet: Figure 3
Figure 3c						Figure 3d																								Figure 3g							Figure 3f
																														Egg		Polar body					Time (s)	Egg											Polar body
DMSO	10	25	50			Distance (μm)	DMSO							50 μM																Intensity	Area	Intensity	Area					Cell #1	Cell #2	Cell #3	Cell #4	Cell #5	Cell #6	Cell #7	Cell #8	Cell #9	Cell #10	Cell #11	Cell #1
124.578	126.333	144.062	63.2649			0	96	96	145	108.25	48	84	96	48	96	96	48	0	48	48	96	48	96	96	96	48				746.14	308.089	624.087	340.307				0.5	0.299159	0.188233	0.161755	0.155325	0.214664	0.067814	0.091601	0.098999	0.084776	0.091689	0.074247	0.299464
175.36	101.4	118.022	115.167			0.0568	56.565	96.011	189.696	64.96	69.462	77.673	137.384	129.418	73.396	72.113	124.344	106.048	48	48	27.505	53.541	49.203	88.596	49.739	47.031				529.058	316.789	282.163	362.805				1	0.286995	0.134641	0.134968	0.160999	0.167319	0.068792	0.07967	0.080401	0.083339	0.064719	0.079549	0.320989
153.108	187.36	96.82	113.227			0.1136	53.671	48.305	139.803	57.92	64.789	53.591	96.164	59.577	64.965	48	96	77.603	81.405	48	46.612	48	45.593	77.995	75.407	22.574				647.506	361.945	363.81	317.512				1.5	0.282193	0.122188	0.140301	0.113873	0.15319	0.06973	0.078011	0.079338	0.089346	0.06647	0.05698	0.313927
192.595	87.4631	128.476	146.338			0.1705	56.506	58.414	151.233	92.823	97.628	85.438	122.261	78.077	62.626	48	96	103.222	57.209	48	48	43.583	51.61	74.397	55.351	47.091				521.052	305.957	575.514	373.547				2	0.213928	0.120248	0.122549	0.102941	0.15269	0.068676	0.067005	0.061258	0.075814	0.061508	0.060013	0.234007
136.888	119.11	110.906	129.232			0.2273	133.422	48.178	176.219	101.182	96	66.719	96.183	74.062	53.328	79.497	89.369	57.963	47.451	48.172	38.9	48	48	94.74	64.764	48				223.499	862.877	175.59	838.522				2.5	0.227536	0.135235	0.138715	0.127315	0.157339	0.061924	0.062354	0.072348	0.079162	0.064791	0.073534	0.30952
188.377	142.314	66.0611	144.183			0.2841	110.473	48	157.932	75.147	89.007	58.076	77.629	93.046	58.062	116.181	96	102.296	73.982	59.212	50.992	46.771	48	121.388	45.504	48				162.486	838.984	157.278	855.012				3	0.314057	0.10749	0.114409	0.132709	0.175095	0.065405	0.067722	0.083673	0.080001	0.070515	0.057922	0.343816
193.476	154.305	152.35	110.774			0.3409	78.987	68.628	153.217	96	58.581	34.747	118.125	49.729	88.327	119.666	81.079	107.875	48.731	32.867	62.791	30.332	96	53.73	50.706	48				551.75	360.684	432.915	320.451				3.5	0.365698	0.115902	0.115363	0.126587	0.168412	0.070382	0.067548	0.069643	0.078032	0.06789	0.062676	0.342901
144.264	150.87	151.053	110.121			0.3977	164.848	119.966	133.977	76.48	63.881	57.311	140.088	48	91.137	77.15	89.576	62.252	78.032	46.202	64.168	48	8.423	88.881	59.361	19.582				149.604	363.089	94.033	312.81				4	0.321472	0.152096	0.161639	0.090844	0.166278	0.064651	0.064113	0.06346	0.073069	0.067034	0.056016	0.312683
157.797	112.685	101.876	72.3452			0.4545	121.844	96.727	145.153	54.167	50.661	81.881	49.644	76.228	89.242	48	109.969	48	55.331	48	74.736	69.239	9.627	51.129	59.374	0.019				116.801	328.47	101.068	350.428				4.5	0.304492	0.124556	0.142145	0.128053	0.169024	0.073226	0.070991	0.070455	0.066882	0.072384	0.071176	0.248662
84.7549	104.508	106.41	74.2813			0.5114	70.481	96	122.021	53.357	63.212	121.985	80.743	119.052	50.469	48	94.293	48	48	70.866	84.088	91.917	58.83	64.854	51.106	51.712											5	0.3333	0.158109	0.138953	0.148942	0.172714	0.06135	0.068802	0.060161	0.068593	0.065553	0.070368	0.320753
98.6296	107.242	115.017	97.8886			0.5682	190.954	74.867	141.722	48.587	57.59	98.295	85.191	48.649	109.799	87.357	64.315	68.753	148.12	68.888	48	96.736	12.033	74.043	48	53.953											5.5	0.457013	0.142811	0.136685	0.135251	0.17449	0.064446	0.062541	0.066357	0.070096	0.066802	0.066515	0.308469
135.59	124.686	100.604	117.674			0.625	145	48.667	121.38	94.529	69.56	89.096	102.856	73.806	49.025	102.991	64.285	68.361	81.361	51.262	48	54.796	48	51.914	58.235	34.293											6	0.286258	0.119325	0.147254	0.133377	0.154009	0.062376	0.0699	0.071423	0.067779	0.065855	0.056704	0.369797
139.586	129.181	113.862	130.778			0.6818	96	100.007	187.35	103.612	83.81	137.064	49.495	95.829	74.181	189.057	155.666	79.282	66.82	50.185	49.118	49.857	48	126.251	76.463	28.465											6.5	0.289807	0.092634	0.121527	0.14014	0.158924	0.066766	0.06694	0.075493	0.070662	0.07144	0.068644	0.321893
61.2415	150.809	146.6	102.091			0.7386	122.489	52.713	174.385	63.68	96.479	51.527	94.151	123.717	93.196	116.484	107.443	95.864	85.25	55.214	29.849	54.575	48	144.299	48	20.162											7	0.370434	0.125275	0.125515	0.129057	0.178774	0.068784	0.068028	0.072018	0.069579	0.065473	0.059966	0.275282
148.34	110.294	131.059	73.0605			0.7955	96	93.914	143.294	112.818	75.97	52.451	53.419	108.082	88.461	98.53	96	54.519	120.781	62.628	77.053	58.48	33.694	59.001	53.781	58.888											7.5	0.33427	0.151809	0.1231	0.137307	0.173027	0.063133	0.068001	0.061824	0.065599	0.066357	0.058411	0.386483
95.2499	124.433	124.69	105.188			0.8523	139.418	91.646	116.783	153.82	68.822	75.055	48.283	63.123	92	105.751	64.254	48	85.788	72.624	51.158	48.406	77.95	75.68	80.402	3.738											8	0.358813	0.116609	0.153049	0.144455	0.176876	0.06458	0.065619	0.080094	0.073393	0.076414	0.056796	0.27715
161.441	112.51	90.4304	162.532			0.9091	93.367	126.609	354.097	149.137	73.084	67.774	23.98	48	56.769	111.327	62.526	66.743	75.74	50.224	28.715	48	106.092	52.346	52.598	24.156											8.5	0.343988	0.130958	0.12974	0.15196	0.1671	0.061764	0.069943	0.072974	0.067739	0.066582	0.065177	0.407506
173.106	175.975	118.719	107.246			0.9659	96	62.928	216.1	166.017	113.903	83.915	47.278	47.665	60.206	100.486	75.205	79.086	73.542	65.291	33.093	79.678	75.543	48	49.963	1.393											9	0.361294	0.098423	0.12556	0.118925	0.176936	0.066855	0.068622	0.072753	0.073123	0.070014	0.056175	0.277556
126.272	137.053	108.642	92.6232			1.0227	51.038	48.862	194.292	112.033	131.745	113.832	75.789	79.47	96	74.044	91.901	50.155	89.424	77.602	35.35	55.928	48	48	82.577	29.581											9.5	0.286034	0.113988	0.108301	0.09534	0.161685	0.069039	0.072026	0.078727	0.068706	0.074116	0.070114	0.302978
88.2809	122.787	79.821	91.6178			1.0795	96	93.105	182.858	110.492	96.147	109.436	49.166	73.828	80.825	51.912	51.238	49.683	65.691	89.914	48	51.834	22.864	48	51.896	46.408											10	0.279719	0.137299	0.118408	0.098663	0.15413	0.060722	0.071013	0.073086	0.069794	0.07532	0.057161	0.334108
98.9549	127.406	114.091	84.3381			1.1364	215.511	75.308	116.948	54.347	121.698	92.073	114.675	48	49.557	62.991	50.262	73.941	81.638	94.081	52.837	84.828	72.067	47.131	76.57	13.023											10.5	0.247194	0.123436	0.136668	0.130301	0.160307	0.059608	0.066281	0.092497	0.07391	0.066043	0.066564	0.290987
161.734		118.877	113.603			1.1932	145	70.4	147.08	68.16	106.977	77.324	51.37	50.821	84.756	62.81	71.65	102.533	58.207	69.397	134.582	71.994	25.27	56.923	91.967	30.399											11	0.316329	0.135069	0.132871	0.106403	0.174009	0.058544	0.067816	0.079917	0.077364	0.066524	0.059511	0.258978
103.008		124.836	99.7319			1.25	159.38	76.392	147.316	61.12	114.576	54.72	107.147	54.626	94.821	69.502	48	134.459	71.421	55.378	69.278	61.593	48	52.422	55.993	34.01											11.5	0.310363	0.125767	0.128553	0.120154	0.167708	0.062132	0.065011	0.076615	0.070566	0.070567	0.060593	0.316302
151.68		109.798	144.99			1.3068	127.426	50.381	222.102	52.905	180.417	101.67	86.717	100.277	65.567	108.186	45.064	99.589	81.965	82.328	14.445	32.031	48	48	48	45.023											12	0.292357	0.139545	0.129117	0.134364	0.15315	0.06432	0.066012	0.074061	0.076857	0.071846	0.05733	0.416923
147.692		121.265	82.4375			1.3636	152.481	92.343	239.713	57.427	176.744	102.902	56.747	49.383	53.938	98.712	84.157	96.61	60.106	48	45.16	35.245	48	58.647	71.169	47.617											12.5	0.235369	0.130654	0.125134	0.15659	0.163724	0.06213	0.066514	0.071894	0.066461	0.070873	0.064343	0.420874
112.327		61.8208	125.456			1.4205	170.114	96	96.219	89.333	184.238	90.05	93.277	48	94.186	105.753	96.481	59.61	66.484	51.822	58.471	55.368	96	90.233	63.717	48											13	0.236616	0.113746	0.126177	0.137915	0.169539	0.070637	0.06586	0.078449	0.070004	0.069286	0.060226	0.330886
153.991		71.9126	137.018			1.4773	193	56.436	144.634	63.04	216.671	90.742	95.391	70.021	96	108.907	61.822	48	83.827	65.54	73.306	49.237	96	61.505	57.089	47.812											13.5	0.319604	0.153331	0.154607	0.12115	0.141577	0.07127	0.061848	0.073148	0.069588	0.070948	0.057406	0.417996
129.8		133.255	106.199			1.5341	96	92.003	188.043	76.864	208.274	88.885	99.925	46.31	85.562	94.891	71.993	48	53.503	95.646	53.811	48.316	48	50.273	112.307	48											14	0.352368	0.117217	0.12873	0.133754	0.162141	0.06896	0.071165	0.090011	0.075103	0.073953	0.058687	0.300827
160.209		108.024	98.0088			1.5909	112.954	54.404	145	121.961	232.832	96	88.979	87.71	86.268	67.439	77.654	48	95.211	143.447	13.137	61.037	14.306	70.946	116.721	43.645											14.5	0.282713	0.170164	0.123467	0.12545	0.17013	0.070781	0.065189	0.076789	0.069928	0.071134	0.072395	0.406672
132.863		77.2097	123.199			1.6477	75.831	92.1	145.087	94.658	258.905	86.095	50.538	118.591	60.206	108.615	48	75.966	94.296	96.141	31.064	57.345	82.897	71.511	48	43.725											15	0.290723	0.105617	0.14833	0.114828	0.192067	0.061216	0.061773	0.080647	0.069579	0.077633	0.060184	0.343436
150.459		101.235				1.7045	122.899	140.333	181.349	91.2	290.245	77.554	48	84.083	67.136	96.883	49.079	58.122	73.054	81.887	59.701	95.235	36.1	45.447	48	39.79											15.5	0.339812	0.122905	0.127207	0.123059	0.193905	0.073989	0.069874	0.077275	0.074795	0.0683	0.062153	0.304236
127.491		101.505				1.7614	96	100.822	165.703	96	244.08	55.083	74.552	73.487	95.944	118.478	48	51.171	72.474	95.831	48	107.661	48	76.718	49.586	44.625											16	0.285875	0.125886	0.118642	0.107297	0.184882	0.073651	0.067595	0.082538	0.066263	0.067919	0.054584	0.304847
148.624		111.799				1.8182	145	140.022	155.414	93.161	480.868	78.019	49.936	46.593	53.055	85.302	114.887	48	65.578	52.056	48	87.531	57.493	64.34	51.193	49.893											16.5	0.313928	0.106831	0.123159	0.111085	0.181278	0.065164	0.067424	0.069163	0.073182	0.064768	0.068376	0.347689
161.274		112.135				1.875	140.089	101.133	113.195	66.221	595.202	76.416	72.595	26.17	115.653	81.941	86.948	113.195	71.304	28.874	6.836	68.389	48	48	73.097	12.279											17	0.322191	0.093508	0.10745	0.124503	0.167133	0.070887	0.066517	0.069	0.066576	0.063902	0.062741	0.269194
142.114		84.8345				1.9318	96.414	117.092	148.587	97.113	487.989	83.292	123.081	49.29	89.472	78.422	48	105.466	71.661	41.921	41.69	49.827	48	24.858	46.681	0											17.5	0.277661	0.094583	0.123307	0.138168	0.174565	0.067166	0.065911	0.072524	0.078521	0.061806	0.061542	0.34671
142.985		144.197				1.9886	141.692	75.321	186.593	124.986	554.562	78.545	162.155	48	48.057	108.101	40.703	96	126.687	11.846	48	20.814	133.111	37.258	32.525	23.926											18	0.245209	0.114873	0.115096	0.10106	0.179512	0.063227	0.065442	0.072455	0.07152	0.061915	0.062741	0.307955
111.086		92.6				2.0454	235.797	92.552	167.281	60.289	655.001	92.917	93.444	56.323	78.267	100.016	45.487	74.449	80.223	41.731	43.022	64.142	91.32	64.384	92.219	48											18.5	0.246209	0.117843	0.127099	0.130516	0.179879	0.067849	0.064981	0.071843	0.072485	0.065354	0.067244	0.395806
133.542		118.789				2.1023	96	126.34	168.249	145.273	696.011	96	95.427	40.542	91.711	106.207	114.663	48.762	60.836	48	48	57.165	3.476	40.775	48	48											19	0.391226	0.105144	0.141126	0.129609	0.175421	0.066588	0.06653	0.079983	0.064536	0.060261	0.065232	0.312584
122.847		120.986				2.1591	181.253	100.579	159.769	185.59	946.505	95.828	135.587	57.971	65.649	88.434	108.578	60.19	55.255	72.573	65.28	34.452	48	35.234	48.161	48											19.5	0.325889	0.111672	0.15426	0.126864	0.177973	0.057963	0.062279	0.070123	0.068948	0.06685	0.059449	0.288714
107.187		79.7508				2.2159	145	96	147.679	97.513	525.63	58.99	57.059	96	51.382	55.26	68.733	73.143	52.21	64.828	63.19	45.579	49.07	49.09	48	48											20	0.304955	0.125472	0.129045	0.148408	0.175052	0.057149	0.062914	0.079509	0.073986	0.07321	0.060284	0.289785
93.5287		109.256				2.2727	162.418	96	134.658	143.367	526.02	80.03	48	96	89.772	67.151	65.527	67.955	75.466	82.374	14.094	20.901	48	51.477	89.751	48											20.5	0.213401	0.095304	0.140558	0.114771	0.179582	0.06496	0.068564	0.075644	0.072158	0.068566	0.074832	0.300988
124.297		101.497				2.3295	190.928	54.248	181.362	190.76	521.855	57.251	119.927	109.942	74.797	84.85	76.482	70.741	62.918	68.058	45.938	62.867	49.337	38.499	95.114	48											21	0.407509	0.095456	0.135373	0.116578	0.171252	0.061704	0.069344	0.078452	0.069307	0.073198	0.067356	0.180566
56.5152						2.3864	166.228	87.689	158.017	163.221	556.056	79.936	55.357	96.95	80.277	68.501	105.034	76.8	59.664	53.984	11.075	91.327	45.46	59.799	74.754	43.853											21.5	0.3603	0.120599	0.135548	0.139535	0.169881	0.066397	0.069013	0.070651	0.073836	0.068475	0.057673	0.246104
148.827						2.4432	170.924	100.995	193.271	136.902	611.183	90.964	106.074	55.415	48	88.883	99.373	65.371	48	49.383	44.463	81.054	3.744	61.899	58.294	48											22	0.275658	0.116715	0.126238	0.109668	0.161328	0.066127	0.062617	0.063337	0.070654	0.067989	0.063809	0.345091
80.9726						2.5	154.118	97.456	155.361	186.596	528.63	85.44	96.992	88.6	48	52.997	71.151	80.457	106.33	55.143	73.63	31.434	52.947	88.618	77.661	38.938											22.5	0.253716	0.158485	0.146405	0.098703	0.176253	0.060648	0.064301	0.07878	0.079131	0.071582	0.056736	0.287761
116.967						2.5568	208.848	66.612	135.889	232.21	481.933	68.288	53.23	26.923	88.705	78.89	65.318	49.959	87.349	48	93.673	36.362	89.85	68.162	88.794	34.76											23	0.390392	0.117696	0.118944	0.111888	0.184202	0.056383	0.072679	0.071014	0.077925	0.068682	0.066233	0.299158
117.128						2.6136	228.148	91.505	116.83	293.907	425.565	67.871	66.59	88.544	68.619	66.322	59.494	69.885	89.36	63.68	41.684	35.415	48	29.106	88.029	48											23.5	0.303392	0.130133	0.128752	0.141338	0.159662	0.066224	0.068697	0.072383	0.082545	0.070476	0.055079	0.239192
58.5436						2.6704	155.734	96	168.589	335.235	383.136	85.03	77.252	51.963	48	66.946	59.468	63.238	77.741	76.374	28.16	41.737	48	72	72.196	35.963											24	0.244336	0.147346	0.148215	0.125651	0.183131	0.057741	0.058228	0.076912	0.071862	0.060864	0.06898	0.202798
						2.7273	152.899	75.851	178.814	386.954	422.268	17.381	52.012	65.181	48.735	56.312	71.477	50.286	52.841	48	48	48	48	76.596	48	26.096											24.5	0.356505	0.138666	0.138688	0.115065	0.16807	0.06365	0.063481	0.077136	0.073386	0.066263	0.069327	0.351351
						2.7841	361.473	75.733	151.153	270.52	536.923	50.082	124.708	60.257	74.537	81.548	95.306	49.422	49.214	56.324	65.179	71.286	48	59.047	79.314	49.774											25	0.435445	0.113076	0.143017	0.130562	0.169705	0.056419	0.066914	0.075136	0.072911	0.062463	0.06184	0.275314
						2.8409	195.506	95.102	171.727	272.75	573.713	49.289	138.831	110.353	58.733	125.132	67.261	71.692	48	92.181	74.526	115.623	60.167	48	127.322	54.371											25.5	0.304735	0.103381	0.139828	0.118493	0.166135	0.059337	0.067866	0.072662	0.072391	0.068741	0.071143	0.352958
						2.8977	145.608	67.15	178.158	414.37	583.564	83.76	101.758	114.45	67.187	182.742	56.168	61.518	55.621	82.614	23.735	51.398	61.37	50.92	92.746	20.612											26	0.216418	0.17956	0.147974	0.122868	0.181792	0.068902	0.058688	0.076774	0.073041	0.074676	0.05429	0.211877
						2.9545	148.443	122.285	186.38	255.896	556.437	78.982	94.781	34.658	48	123.315	67.973	95.38	72.346	73.89	47.888	90.053	81.426	69.913	52.26	25.506											26.5	0.219068	0.118584	0.123331	0.127013	0.183748	0.06004	0.068077	0.075667	0.07196	0.0721	0.066411	0.180502
						3.0114	205.688	113.672	154.425	369.575	470.73	58.505	53.504	41.198	48	139.894	67.752	115.094	87.411	85.59	26.607	82.106	80.223	104.601	59.657	22.525											27	0.2682	0.12446	0.135252	0.158464	0.176522	0.061916	0.060226	0.066846	0.066275	0.068233	0.066112	0.255425
						3.0682	202.304	94.678	205.317	402.052	574.651	132.742	82.046	67.515	48	145	49.579	69.771	48.432	83.397	43.115	71.385	48	98.47	85.305	48											27.5	0.256293	0.132578	0.105621	0.117851	0.166533	0.064995	0.072055	0.069707	0.076929	0.066148	0.061136	0.281617
						3.125	181.051	135.802	196.58	379.026	567.735	134.8	52.721	87.452	48	203.16	31.068	48.726	48	52.202	36.532	66.69	77.816	85.747	92.592	30.114											28	0.335808	0.110207	0.137642	0.143157	0.16583	0.066235	0.06687	0.075748	0.076821	0.070115	0.05645	0.243579
						3.1818	279.245	67.978	166.271	451.697	514.184	74.698	62.065	52.878	48	194.664	37.461	58.052	48.163	78.571	37.358	70.494	48	77.747	47.909	0.348											28.5	0.258928	0.134464	0.135399	0.149556	0.190268	0.063052	0.069023	0.083022	0.070435	0.06664	0.061107	0.242447
						3.2386	303.392	88.721	167.154	422.975	443.619	88.533	67.99	75.597	86.103	163.473	57.311	54.335	85.764	66.259	50.88	98.848	117.02	100.001	38.138	38.135											29	0.280655	0.122825	0.128461	0.160797	0.17366	0.056015	0.067141	0.072919	0.07772	0.070072	0.078436	0.357084
						3.2954	227.675	105.392	149.819	464.08	423.713	70.82	72.209	85.373	96	156.088	68.859	61.25	93.333	53.948	34.087	96	69.794	80.203	87.05	65.716											29.5	0.300479	0.144562	0.161618	0.168273	0.182552	0.06446	0.07118	0.07232	0.071655	0.068589	0.059885	0.27234
						3.3523	316.865	86.814	156.682	589.14	650.5	68.943	74.449	56.285	72.529	87.419	88.377	51.81	57.503	48.257	19.78	95.564	45.994	83.512	43.946	32.511											30	0.346582	0.15	0.114614	0.151124	0.186767	0.064658	0.072811	0.069891	0.075126	0.066742	0.061651	0.273268
						3.4091	417.924	53.66	201.153	694.74	525.315	110.886	52.525	83.507	54.275	185.317	52.316	50.612	57.868	75.128	39.224	89.504	48	103.065	54.628	48											30.5	0.279582	0.129978	0.119269	0.109238	0.18378	0.059767	0.056361	0.073103	0.07806	0.067686	0.055209	0.269265
						3.4659	494.527	48	203.905	868.557	611.86	92.852	88.91	92.712	60.013	129.085	61.816	95.709	75.966	49.863	40.547	90.053	70.596	73.781	53.859	48											31	0.296013	0.14534	0.141098	0.095901	0.170154	0.063456	0.062463	0.070899	0.07391	0.060952	0.06477	0.216426
						3.5227	630.743	68.316	169.788	1179.54	564.44	68.348	55.206	58.884	95.778	157.412	60.144	100.683	62.617	52.025	43.564	51.398	96	48	75.169	48											31.5	0.284763	0.092456	0.149877	0.128019	0.167331	0.063601	0.06304	0.084862	0.072859	0.068296	0.065937	0.247832
						3.5795	518.43	92.16	239.997	1481.68	562.679	105.975	83.852	53.068	99.928	147.531	62.949	67.2	53.133	60.628	33.688	87.768	75.811	52.463	62.823	48											32	0.265968	0.103535	0.132072	0.121116	0.169696	0.073074	0.05992	0.080178	0.074614	0.073324	0.06746	0.295281
						3.6364	698.869	70.259	305.619	1658.49	480.301	114.591	56.802	66.674	64.672	129.335	69.361	80.646	42.691	56.584	48	70.088	86.368	40.764	48	40.409											32.5	0.27698	0.097014	0.129977	0.11401	0.166651	0.061039	0.064279	0.076321	0.076473	0.069216	0.07492	0.325439
						3.6932	792.316	60.19	304.828	1689.06	756.569	61.983	48.274	85.696	72.082	116.757	94.698	96	43.988	72.243	29.385	64.566	78.217	30.106	48	0.485											33	0.287519	0.073228	0.142094	0.123752	0.169726	0.061813	0.071146	0.068545	0.072713	0.065157	0.064893	0.425749
						3.75	780.089	94.772	271.75	1891.84	668.988	118.47	48	61.646	96	143.887	73.644	91.559	53.786	90.06	47.553	84.324	96	75.607	48	56.268											33.5	0.228692	0.149974	0.157192	0.150517	0.157482	0.061193	0.062778	0.074285	0.073263	0.071055	0.069202	0.323058
						3.8068	819.907	131.539	296.903	1962.41	691.088	96	55.692	70.356	87.423	245.583	93.978	92.19	60.533	89.953	48	81.873	48	66.525	60.268	54.161											34	0.297732	0.126556	0.140344	0.093528	0.150623	0.06872	0.058631	0.072033	0.072663	0.0768	0.060329	0.371019
						3.8636	984.903	104.894	398.702	2062.11	778.058	106.863	90.221	50.529	48	197.313	85.314	86.102	86.317	98.891	21.221	71.107	48	91.035	56.117	25.988											34.5	0.224257	0.121502	0.120616	0.131901	0.163612	0.053498	0.06606	0.073193	0.070097	0.075521	0.086515	0.359737
						3.9204	801.203	96.809	472.269	1863.56	673.516	113.161	96	48	48	134.766	72.994	67.135	48.574	87.051	22.232	69.378	25.939	55.248	65.154	29.491											35	0.204848	0.118338	0.145563	0.114208	0.160013	0.058725	0.066697	0.07751	0.078921	0.069412	0.05702	0.284631
						3.9773	1199.39	129.877	663.572	1912.13	554.85	128.133	96	79.778	48.33	158.002	97.657	35.556	61.648	48	36.366	81.054	48	67.48	91.207	34.047											35.5	0.265323	0.117431	0.152761	0.11689	0.154934	0.067409	0.063055	0.065673	0.079195	0.065225	0.068948	0.458908
						4.0341	1018	98.165	527.164	1928.69	576.507	106.652	96	63.491	60.334	144.079	99.746	76.459	87.839	68.644	3.916	87.504	48	84.818	70.266	57.235											36	0.291082	0.107334	0.118017	0.111714	0.176527	0.057189	0.063856	0.081792	0.077225	0.063264	0.069245	0.383879
						4.0909	1010.85	159.742	712.307	1916.03	648.382	166.25	96	76.274	50.801	216.306	104.48	48	79.262	71.968	28.502	48.85	48	55.904	88.047	53.345											36.5	0.289081	0.114482	0.118699	0.112615	0.180241	0.071069	0.06199	0.076435	0.079353	0.069385	0.062625	0.277691
						4.1477	987.996	131.491	1115.03	2006.21	535.256	187.735	70.071	67.2	48	132.304	110.551	55.343	71.339	66.211	48	48	87.844	55.928	51.64	34.466											37	0.245232	0.145818	0.127283	0.123188	0.158309	0.059338	0.066082	0.072061	0.074728	0.065485	0.066622	0.188115
						4.2045	980.764	120.698	834.83	1979.14	610.232	165.268	89.69	62.486	49.897	108.521	66.549	86.066	67.529	48	64.57	51.526	54.953	80.322	65.865	34.486											37.5	0.246149	0.112799	0.129081	0.106439	0.160267	0.066779	0.066585	0.060603	0.068838	0.068488	0.065719	0.238602
						4.2614	1114.11	121.667	1060.48	1966	540.002	133.769	96	52.918	59.846	141.691	48	53.224	57.268	54.734	42.316	68.511	48	90.478	93.748	53.088											38	0.307672	0.105488	0.127213	0.127754	0.172532	0.054678	0.068322	0.072925	0.068996	0.069732	0.067994	0.244145
						4.3182	1139.52	141.749	1322.85	2268.6	563.771	155.238	96	55.411	42.162	116.249	48	69.145	76.662	74.821	55.68	59.533	48	58.734	16.887	0											38.5	0.281471	0.104843	0.099768	0.108357	0.160279	0.063808	0.067473	0.071955	0.070576	0.064478	0.066947	0.252841
						4.375	1083.48	88.188	1521.41	2174.95	619.506	139.416	96	55.705	82.732	130.3	48	50.489	91.698	120.335	44.084	64.566	48	49.062	46.086	3.349											39	0.316061	0.115653	0.135819	0.131484	0.162637	0.063951	0.062847	0.065198	0.070895	0.069931	0.067456	0.24886
						4.4318	1185.62	62.629	1800.12	2023.55	566.204	142.611	94.303	86.895	66.641	87.982	48.547	94.694	116.09	81.559	20.083	67.569	48	55.909	51.124	44.671											39.5	0.248014	0.129402	0.154153	0.09361	0.176449	0.06697	0.068007	0.067997	0.072592	0.069329	0.068393	0.34067
						4.4886	1022.67	151.091	1888.34	2042.88	491.753	220.982	198.667	89.836	59.546	171.725	77.655	63.55	125.391	57.214	24.044	113.601	47.064	87.064	59.645	13.395											40	0.338777	0.098584	0.119093	0.101463	0.186168	0.05792	0.069817	0.069319	0.078576	0.073837	0.061351	0.402963
						4.5454	1049.6	124.502	1910.5	1999.05	615.562	163.936	142.646	49.165	74.569	171.138	50.004	76.19	86.272	42.188	23.136	98.947	95.733	79.66	74.982	22.14											40.5	0.233132	0.110009	0.117149	0.121127	0.153438	0.073596	0.06368	0.069549	0.078988	0.074052	0.060148	0.2197
						4.6023	812.203	133.48	2183.24	1931.01	741.703	251.942	100.359	60.408	91.215	101.979	66.032	114.482	64.054	20.334	52.987	59.344	94.529	72.185	61.272	48											41	0.23115	0.111929	0.143146	0.15128	0.166054	0.067554	0.066434	0.06341	0.07785	0.065677	0.060518	0.291044
						4.6591	1070.22	112.686	2269.69	1761.85	584.621	250.577	82.401	54.339	134.305	124.442	113.317	96	70.271	55.635	75.372	123.58	45.326	71.196	63.898	48											41.5	0.404657	0.112406	0.127585	0.106487	0.188148	0.071756	0.063971	0.062828	0.076472	0.06892	0.07101	0.208436
						4.7159	799.827	95.353	2259.99	1921.17	507.281	290.103	91.842	50.349	161.291	145	60.624	80.036	52.459	79.53	35.652	68.74	92.123	18.47	83.713	41.095											42	0.269375	0.128683	0.130553	0.114598	0.184537	0.069887	0.079681	0.066513	0.073465	0.069681	0.063183	0.19858
						4.7727	890.215	134.92	2260.85	1944.92	649.898	291.582	96	57.105	86.101	145	64.3	89.6	93.876	73.736	29.124	73.883	48	89.286	67.092	42.853											42.5	0.308375	0.147777	0.117624	0.10957	0.186705	0.065485	0.067585	0.072584	0.077014	0.081085	0.070414	0.187699
						4.8295	827.595	104.663	1931.57	1775.43	733.452	385.44	80.216	23.5	57.269	181.398	48.836	59.429	99.399	58.717	48.033	71.524	48	48.513	63.005	52.24											43	0.417529	0.162178	0.136149	0.113896	0.182032	0.081565	0.071127	0.063286	0.072611	0.064004	0.05879	0.271046
						4.8864	719.624	92.339	1801.54	1786.91	702.838	533.739	67.422	61.931	116.47	173.763	72.126	75.185	107.733	98.679	48	48.425	55.487	63.765	97.965	48											43.5	0.339387	0.140473	0.134046	0.119764	0.179097	0.058715	0.062546	0.076313	0.079524	0.071899	0.058827	0.292275
						4.9432	643.481	199.436	2166.69	1488.64	629.298	594.005	98.529	82.525	109.545	239.836	63.793	69.701	89.775	81.186	84.379	49.737	104.872	92.426	75.819	35.202											44	0.274636	0.133806	0.128409	0.106201	0.169839	0.066191	0.066367	0.078745	0.067848	0.069568	0.065667	0.321993
						5	416.764	132.965	1953.83	1305.2	752.514	614.086	97.896	59.402	112.624	244.168	76.684	71.191	64.876	22.686	59.573	83.388	48	46.24	68.771	48											44.5	0.280694	0.164828	0.149864	0.138189	0.165022	0.059492	0.068439	0.085179	0.072013	0.069011	0.058534	0.357147
						5.0568	555.101	96	2006.77	1246.12	968.37	548.356	92.079	57.468	136.343	239.88	105.733	96	56.438	52.565	48	83.899	48	14.882	104.845	23.07											45	0.461028	0.13164	0.145416	0.120969	0.16065	0.058361	0.065486	0.081729	0.061941	0.060014	0.055621	0.234191
						5.1136	439.418	96	1928.22	1317.27	627.564	600.327	59.181	96	186.567	327.716	87.658	88.163	95.522	44.89	70.737	57.079	96	49.804	76.826	39.284											45.5	0.282372	0.150655	0.147151	0.109182	0.166709	0.062306	0.073609	0.072013	0.066672	0.068809	0.073652	0.352042
						5.1704	516.557	140.452	2017.33	1282.97	552.424	521.575	85.424	94.948	169.691	241.507	131.662	83.556	86.179	45.601	77.811	125.923	117.71	99.272	55.462	48											46	0.238917	0.127661	0.128841	0.090622	0.155146	0.063121	0.074304	0.074039	0.067043	0.072927	0.067216	0.254826
						5.2273	429.156	135.728	1541.66	1612.19	500.047	544.4	91.212	51.156	318.675	252.713	57.845	76.379	51.406	63.85	48	71.994	81.292	133.753	82.587	48											46.5	0.391124	0.125889	0.124519	0.118319	0.164957	0.063253	0.06487	0.074058	0.07241	0.077107	0.064824	0.218889
						5.2841	684.557	102	1303.52	1623.26	525.28	750.017	93.775	56.906	244	205.56	68.056	74.558	54.965	81.62	44.338	84.828	48	48.334	48	48											47	0.233141	0.109996	0.11355	0.127308	0.189716	0.070632	0.071637	0.073651	0.063739	0.06545	0.070144	0.191938
						5.3409	625.848	159.457	1375.09	1493.21	691.169	772.605	138.45	115.152	395.816	264.15	51.77	86.278	67.891	62.655	12.884	76.483	78.886	72	49.684	48											47.5	0.281337	0.131615	0.127546	0.110136	0.183633	0.051766	0.068596	0.070731	0.065949	0.071335	0.059748	0.22156
						5.3977	521.654	128.636	1283.9	1478.9	786.798	668.003	159.842	80.552	284.342	229.73	63.182	54.676	72.181	53.012	60	71.788	48	95.666	49.008	48											48	0.209876	0.158666	0.143336	0.137213	0.183544	0.054583	0.062315	0.074317	0.070163	0.070217	0.075361	0.262799
						5.4545	550.025	197.18	1045.63	1145.29	521.6	679.477	188.099	82.625	272.437	194.592	48.211	64.327	89.595	35.676	65.243	62.867	67.521	96	33.127	75.193											48.5	0.342248	0.175431	0.137972	0.116569	0.164034	0.065215	0.067385	0.076754	0.073832	0.066682	0.065791	0.231198
						5.5113	868.603	176.366	869.916	1229.71	593.738	832.721	118.541	93.461	338.667	264.501	75.75	101.162	94.012	49.691	44.212	115.569	48	94.27	79.952	40.186											49	0.245565	0.141567	0.100881	0.124412	0.170962	0.052006	0.065292	0.079982	0.06542	0.070043	0.063841	0.288551
						5.5682	448.392	118.818	1055.17	860.497	881.848	698.41	155.091	73.075	363.765	193.592	55.791	120.504	104.858	51.972	6.534	94.797	92.312	49.804	58.509	8.253											49.5	0.235233	0.113396	0.113603	0.120914	0.185241	0.066352	0.061442	0.066499	0.068543	0.071676	0.065868	0.291185
						5.625	477.911	133.12	1216.52	902.8	965.709	506.032	115.463	109.108	326.249	238.28	102.817	88.62	60.726	94.704	29.811	62.442	48	114.926	48	17.86											50	0.255944	0.111861	0.147576	0.131248	0.170431	0.065374	0.063474	0.071881	0.077347	0.069664	0.068145	0.24418
						5.6818	488.549	125.033	1262.49	734.306	937.979	476.645	123.784	101.714	313.1	295.046	108.69	87.632	76.357	84.553	30.316	66.044	48	70.679	48	77.759											50.5	0.230488	0.150986	0.116945	0.119654	0.172579	0.05973	0.062317	0.075142	0.072071	0.070466	0.062724	0.29412
						5.7386	636.654	141.273	905.992	578.507	677.974	603.448	118.669	99.466	309.598	366.624	58.178	55.314	74.559	72.346	26.388	51.665	70.462	75.83	64.404	19.401											51	0.221788	0.112354	0.113196	0.126576	0.188213	0.065412	0.072123	0.07465	0.070414	0.069255	0.058742	0.264416
						5.7954	578.544	146.483	1053.46	385.172	645.099	640.738	98.32	138.385	387.005	290.318	48	95.793	49.298	115.421	48	74.487	74.741	62.678	83.925	73.674											51.5	0.213259	0.167283	0.128044	0.116634	0.183522	0.064845	0.070423	0.077594	0.073702	0.068062	0.06291	0.283424
						5.8523	719.257	145	1188.61	467.593	759.92	547.495	132.067	96.991	421.837	268.614	48	76.784	72.952	112.03	48	92.782	48	87.069	52.26	68.742											52	0.224448	0.130517	0.136986	0.131781	0.171868	0.057266	0.063684	0.08481	0.072169	0.065707	0.072138	0.242013
						5.9091	683.139	138.58	1071.5	601.978	479.684	628.277	108.339	84.979	473.549	231.353	48	180.333	96	82.941	44.968	75.964	66.852	11.821	53.964	48.675											52.5	0.275332	0.119805	0.15326	0.101911	0.166014	0.069845	0.067097	0.068522	0.070935	0.068972	0.067713	0.243097
						5.9659	524.304	193.222	841.004	435.42	456.112	498.256	163.485	101.866	538.959	225.8	80.883	80	73.591	51.32	27.158	69.239	48	85.871	56.813	48											53	0.402043	0.111413	0.143905	0.102598	0.174284	0.058277	0.068465	0.081095	0.069017	0.069411	0.066446	0.288367
						6.0227	667.932	159.049	927.956	380.88	372.558	550.035	175.011	153.576	678.455	270.51	72.087	76.575	48.189	96.188	50.274	48	81.234	109.039	54.249	44.547											53.5	0.3533	0.146368	0.168048	0.12111	0.180594	0.059546	0.062458	0.082985	0.080899	0.072153	0.058441	0.364858
						6.0795	664.633	171.904	985.252	303.836	274.999	489.955	134.711	145.501	690.053	354.65	79.037	95.536	61.85	115.085	50.195	62.097	111.56	75.537	67.17	68.578											54	0.339485	0.09468	0.138704	0.1062	0.171358	0.064442	0.064982	0.062197	0.070753	0.059524	0.067558	0.347632
						6.1363	913.696	193	1019.09	333.859	160.24	572.062	214.515	84.639	679.116	275.019	51.126	96.882	48	83.274	48	5.857	62.039	38.809	59.839	54.698											54.5	0.3545	0.129929	0.122663	0.121797	0.192585	0.056138	0.071	0.07546	0.066944	0.070449	0.06903	0.242011
						6.1932	783.194	162.905	1048.69	277.957	162.473	683.859	155.119	69.304	685.842	359.825	48.897	113.141	62.11	58.588	21.535	50.725	96	79.404	63.003	29.343											55	0.274427	0.10996	0.119244	0.121912	0.181348	0.063564	0.062189	0.076945	0.06315	0.062061	0.076325	0.250912
						6.25	883.523	145.992	1233.35	498.134	211.169	560	154.972	92.487	749.321	427.428	57.926	142.037	91.763	93.994	40.022	52.417	48	57.181	48	43.152											55.5	0.177468	0.107382	0.137072	0.128852	0.160302	0.060335	0.062449	0.066887	0.068797	0.063799	0.069791	0.331289
						6.3068	772.19	184.439	1199.2	384.854	206.114	515.784	107.562	74.355	1225.14	647.52	85.878	146.763	76.084	65.237	25.431	48	48	122.547	49.992	11.5											56	0.197121	0.113338	0.15095	0.136335	0.175049	0.071972	0.072434	0.080631	0.077531	0.069606	0.060894	0.298622
						6.3636	979.473	236.208	1142.93	222.35	205.329	588.518	118.136	87.588	1330.86	418.666	74.505	175.222	130.032	42.612	30.188	67.54	48	113.746	86.138	47.072											56.5	0.236979	0.100928	0.130646	0.111567	0.179617	0.056997	0.072347	0.068541	0.07654	0.064109	0.048756	0.392258
						6.4204	864.287	176.235	1161.11	282.335	173.897	564.057	134.05	74.541	1078.71	336.779	55.27	135.667	71.702	104.791	71.729	96	48	106.018	95.909	47.922											57	0.289272	0.087622	0.138595	0.097937	0.168954	0.069565	0.059019	0.0816	0.084867	0.075122	0.057676	0.325308
						6.4773	798.215	139.258	1300.47	380.262	185.124	775.946	90.053	62.76	1051.83	401.94	103.935	92.49	54.501	154.064	50.88	51.804	87.51	88.245	51.408	60.727											57.5	0.226259	0.104114	0.137125	0.119877	0.173228	0.058142	0.065817	0.08532	0.065194	0.066801	0.060962	0.272958
						6.5341	989.924	265.312	1458.89	294.023	218.351	647.916	54.72	92.055	1104.18	511.576	94.521	126.333	65.917	72.207	82.737	51.473	53.616	82.998	79.34	51.144											58	0.235295	0.125875	0.158518	0.140716	0.14983	0.070029	0.077182	0.079475	0.065256	0.066479	0.055963	0.283933
						6.5909	836.063	217.389	1677.54	266.654	144.302	696.081	82.263	82.9	1285.53	631.898	89.717	145	58.717	59.896	88.496	63.548	48	125.908	59.09	75.445											58.5	0.262504	0.205109	0.15167	0.102	0.155944	0.059915	0.064196	0.061766	0.068942	0.068244	0.05654	0.27493
						6.6477	885.38	272.869	1914.42	257.098	106.161	789.812	98.296	63.291	1579.73	700.109	74.852	133.6	107.706	93.787	49.734	85.381	96	143.864	66.462	48											59	0.330552	0.109994	0.122658	0.111903	0.180652	0.069941	0.072507	0.073411	0.061239	0.066706	0.070869	0.329176
						6.7045	881.257	386.554	1883.32	316.653	96	697.365	78.51	56.171	1301.31	604.54	90.997	141.148	68.597	96	48	49.229	48	72.766	91.967	48											59.5	0.167536	0.151705	0.148804	0.081811	0.174575	0.063934	0.073591	0.064345	0.067262	0.068804	0.060097	0.354974
						6.7613	1279.15	493.96	1785.26	385.626	122.865	555.397	118.571	48	1489.14	667.627	82.332	147.489	58.394	96	48	47.906	96	73.375	65.711	25.847											60	0.435183	0.098828	0.152675	0.107928	0.191338	0.074112	0.074314	0.081262	0.065856	0.061224	0.058053	0.23249
						6.8182	806.696	456.247	1849.13	334.77	178.615	505.606	154.318	78.886	1434.96	807.742	93.158	155.449	114.286	55.193	27.856	33.204	96	165.101	71.041	74.148											60.5	0.231802	0.10309	0.126918	0.111951	0.186028	0.06913	0.068607	0.092061	0.06705	0.057776	0.067415	0.354979
						6.875	993.439	392.303	1783.9	317.121	153.764	532.248	122.659	104.786	1557.48	820.368	57.348	169.65	143.485	87.453	44.688	69.239	1.604	103.629	88.815	91.952											61	0.293164	0.171896	0.101105	0.12684	0.167464	0.06575	0.073615	0.065196	0.072169	0.059377	0.054701	0.40459
						6.9318	872	547.155	1879.48	277.222	133.474	755.699	82.187	112.295	1647.65	896.652	109.158	208.259	145.13	138.794	70.947	79.858	50.808	99.245	72.287	57.906											61.5	0.246965	0.09909	0.142192	0.137448	0.184797	0.06063	0.069195	0.07676	0.082561	0.066389	0.059528	0.351511
						6.9886	1170.43	474.298	1784.43	297.175	146.857	563.547	140.699	121.759	1693.09	804.031	139.984	181.335	67.009	137.038	111.095	53.586	48	66.271	82.75	68.11											62	0.285695	0.065786	0.148849	0.112668	0.200297	0.069963	0.076926	0.071275	0.072119	0.064997	0.058001	0.337365
						7.0454	1020.16	455.869	1596.05	198.519	121.48	538.149	160.722	141.299	1518.5	731.351	131.32	213.906	50.054	110.121	94.325	71.239	90.786	115.998	144.443	81.91											62.5	0.370579	0.155768	0.124818	0.11476	0.162519	0.064705	0.069138	0.080143	0.078506	0.061466	0.07039	0.244616
						7.1023	960.165	730.051	1699.86	191.667	125.777	748.141	116.117	142.986	1566.45	955.863	141.505	354.138	87.926	101.984	17.059	60.929	89.582	145	126.279	51.6											63	0.251158	0.149401	0.122694	0.11301	0.160603	0.064575	0.066406	0.075075	0.0745	0.065141	0.060183	0.278742
						7.1591	834.835	559.8	1912.01	192.213	128.565	794.498	104.08	98.282	1450.01	1076.14	115.754	542.2	98.747	163.79	77.558	109.082	48	130.903	82.083	139.345											63.5	0.251671	0.192567	0.123999	0.136501	0.172959	0.062832	0.06112	0.067994	0.071039	0.062499	0.060191	0.306927
						7.2159	815.443	559.952	1766.85	184.289	125.545	654.45	143.628	104.136	1375.56	1022.36	93.755	501.78	66.455	154.094	57.221	53.244	87.175	97.678	59.361	95.385											64	0.286459	0.217749	0.135333	0.116226	0.177891	0.065301	0.063144	0.068014	0.06655	0.071603	0.064824	0.318338
						7.2727	732.435	680.128	1800.4	149.441	146.151	545.788	239.426	132.537	1457.54	957.373	83.25	784.933	112.187	187.616	99.851	13.612	48	118.873	98.694	109.926											64.5	0.215492	0.158084	0.142749	0.099105	0.168575	0.067345	0.070226	0.078434	0.080164	0.072296	0.068132	0.405355
						7.3295	1018.73	714.602	1861.37	182.44	227.794	502.647	156.699	95.342	1360.63	1056.82	70.032	958.81	122.399	235.85	103.098	68.528	48	114.245	125.667	145											65	0.228885	0.106531	0.133342	0.134052	0.180646	0.063643	0.057899	0.064568	0.077432	0.065062	0.068142	0.332404
						7.3863	825.603	655.896	1818.35	232.228	152.621	488.638	66.619	100.444	1245.82	1065.14	108.834	979.423	122.921	260.984	94.629	68.2	83.565	211.941	184.976	77.682											65.5	0.373178	0.114969	0.137907	0.135838	0.183477	0.075257	0.068374	0.069607	0.07243	0.070484	0.054508	0.355156
						7.4432	931.068	469.664	1917.79	142.949	155.423	476.376	144.373	161.753	1142.62	1118.95	142.987	1082.68	177.341	212.833	86.096	96.648	48	242.89	144.835	123.95											66	0.20713	0.109374	0.130537	0.135549	0.180502	0.069245	0.068271	0.075567	0.080543	0.067062	0.074517	0.331198
						7.5	865.582	449.22	2119.62	134.044	139.636	767.152	189.508	186.223	1165.61	1085.96	131.36	1592.73	120.648	254.215	72.253	79.1	129.85	245.178	145.252	104.05											66.5	0.249036	0.094894	0.120244	0.118759	0.159871	0.065258	0.071676	0.088785	0.074161	0.06769	0.055677	0.293321
						7.5568	1040.7	520.91	2151.07	109.541	110.244	639.892	170.386	203.946	1156.45	1106.2	97.486	1818.59	144.93	386.985	58.08	169.701	64.045	335.304	211.888	103.275											67	0.271808	0.172632	0.142648	0.115582	0.154368	0.073524	0.06928	0.073252	0.078776	0.069817	0.061633	0.282899
						7.6136	1003.91	659.28	1844.81	96.527	149.879	612.42	150.958	225.526	1093.57	1171.13	139.433	1514.58	128.397	348.608	62.653	80.963	96	335.009	190.087	159.553											67.5	0.344817	0.140239	0.140271	0.122908	0.173993	0.061685	0.0733	0.065712	0.074268	0.075993	0.061915	0.334845
						7.6704	1060	730.388	1822.1	174.77	71.632	648.235	127.191	220.686	1077.57	1513.35	112.358	1753.73	118.304	296.773	115.945	121.558	96	324.72	162.291	71.774											68	0.243581	0.204164	0.136819	0.106062	0.167004	0.073407	0.065224	0.071362	0.071116	0.072689	0.050879	0.370838
						7.7273	638.169	563.196	1963.45	243.146	55.359	652.564	156.394	242.815	1309.88	1461.47	172.773	2154.59	142.379	383.844	167.103	104.314	153.281	419.963	245.754	135.94											68.5	0.158048	0.103485	0.159449	0.125344	0.184506	0.058212	0.077949	0.061998	0.083319	0.068954	0.061196	0.451419
						7.7841	920.987	630.987	1527.03	166.414	90.66	499.237	167.781	227.233	1024.13	1506.03	120.62	1829.43	216.785	357.553	143.968	78.728	68.858	467.851	271.449	154.415											69	0.16662	0.134179	0.130393	0.147703	0.158578	0.071011	0.062525	0.074981	0.07551	0.067109	0.057087	0.284777
						7.8409	610.468	818.535	1470.96	156.115	65.456	613.111	204.487	281.823	1065.16	1507.81	81.398	1587.11	225.376	507.992	99.611	102.504	189.582	657.741	254.151	191.146											69.5	0.188269	0.130631	0.145477	0.133905	0.162627	0.06224	0.071087	0.073845	0.078474	0.070882	0.065892	0.269582
						7.8977	833.392	768.108	1590	191.078	57.484	627.379	173.853	293.813	1197.44	1219.85	170.222	1668.94	166.22	477.428	136.747	122.847	168.265	797.533	257.845	259.391											70	0.30785	0.102748	0.138513	0.132944	0.172227	0.059353	0.066723	0.064382	0.069914	0.064266	0.057991	0.315595
						7.9545	991.329	639.222	1496.8	220.364	101.259	583.79	226.227	296.814	1263.96	1175.02	146.425	1834.89	273.91	479.058	96.097	132.214	96	742.37	342.017	252.501											70.5	0.279701	0.141546	0.10745	0.115137	0.171364	0.068683	0.064442	0.064749	0.065596	0.062702	0.068925	0.446371
						8.0113	798.025	584.355	1320.49	190.808	120.205	582.393	160.939	398.713	1190.12	1542.87	236.13	1712.8	254.124	639.208	96.463	126.001	170.671	830.375	392.163	223.387											71	0.250982	0.168834	0.109397	0.116612	0.163052	0.067926	0.064536	0.070767	0.067393	0.071298	0.060455	0.296698
						8.0682	958.426	619.678	1495.21	171.024	95.924	620.043	128.35	422.776	1270.4	1455.22	234.368	1626.84	227.089	591.763	77.632	120.03	160.256	1034.83	476.871	243.675											71.5	0.154924	0.092251	0.11868	0.136008	0.173031	0.066423	0.061645	0.080071	0.079066	0.065685	0.072238	0.301946
						8.125	589.38	767.001	1667.51	156.519	69.162	654.216	207.182	564.778	892.408	1395.94	90.698	1431.68	276.842	651.743	127.699	215.251	118.412	934.099	444.609	290.112											72	0.278054	0.14118	0.128247	0.133706	0.150435	0.063725	0.067936	0.071749	0.07804	0.0698	0.060271	0.233893
						8.1818	733.114	822.82	1490.53	178.541	56.671	718.775	260.632	516.06	1217.42	1490.77	119.543	1405.77	321.892	632.933	289.31	175.809	166.769	911.939	475.214	313.314											72.5	0.167839	0.124617	0.127228	0.127966	0.183172	0.066305	0.057516	0.069745	0.070782	0.064957	0.061536	0.300264
						8.2386	657.139	831.959	1613.56	155.813	63.384	661.246	297.699	530.238	1151.61	1629.59	145.433	1351.4	354.516	754.727	237.376	183.251	237.089	941.61	644.588	290.674											73	0.381293	0.126469	0.121693	0.111028	0.177992	0.06348	0.071478	0.070544	0.071381	0.061757	0.065663	0.310984
						8.2954	758.852	755.107	1569.26	129.17	54.949	732.176	311.268	626.4	1130.14	1475.25	215.829	1324.82	421.183	736.284	298.292	212.195	176.688	991.734	841.646	422.625											73.5	0.203902	0.160278	0.105255	0.130543	0.177155	0.061166	0.06105	0.073978	0.07317	0.077704	0.06548	0.257729
						8.3523	982.114	756.924	1744.99	143.878	56.797	800.076	377.067	875.775	1156.29	1610.39	141.117	1311.13	490.225	656.553	398.378	309.694	226.577	997.246	977.989	388.922											74	0.402069	0.132643	0.124149	0.100976	0.156514	0.064031	0.061318	0.072102	0.06648	0.080059	0.071854	0.303844
						8.4091	919.422	798.453	2016.79	215.504	112.212	934.787	470.646	1013.56	1152.24	1872.04	168.369	1597.41	575.131	678.38	236.969	353.484	197.262	860.644	822.194	337.505											74.5	0.319905	0.13861	0.129523	0.14425	0.174461	0.064358	0.068476	0.072328	0.081422	0.070892	0.057025	0.368848
						8.4659	1062.47	587.021	1807.24	173.734	106.801	714.388	639.14	928.971	1217.64	2158.4	215.4	1466.8	682.133	864.315	237.628	290.302	254.702	858.459	980.954	374.273											75	0.31897	0.166721	0.149412	0.136714	0.198262	0.07429	0.071907	0.086751	0.076012	0.065561	0.068016	0.222539
						8.5227	1023.7	570.902	1836.76	108.25	99.926	826.583	633.057	1321.91	1197.77	1829.4	255.107	1122.48	879.117	742.341	316.855	372.042	265.237	996.366	939.749	426.103											75.5	0.260839	0.146789	0.16194	0.132999	0.175256	0.06049	0.069304	0.090185	0.073225	0.05677	0.074161	0.231751
						8.5795	972.928	637.372	1580.13		99.524	742.569	735.965	1476.26	1486.51	1897.39	276.107	1048.23	1143.85	882.3	423.928	508.835	478.418	1054.19	1177.06	550.847											76	0.37827	0.160519	0.120095	0.12431	0.162882	0.058325	0.066898	0.075428	0.073892	0.064553	0.062638	0.250969
						8.6363	778.186	561.105	1579.05		86.794	762.759	836.08	1581.36	1264.14	2044.01	247.797	1044.96	1149.99	681.754	379.24	630.193	377.908	976.698	1239.92	435.209											76.5	0.357947	0.119957	0.111544	0.150207	0.174977	0.061379	0.06591	0.062839	0.069982	0.062509	0.057804	0.263005
						8.6932	1033.54	562.941	1593.95		63.925	765.229	939.038	1687.32	1059.9	1872.41	253.536	987.592	1184.57	969.903	572.754	663.309	331.933	993.968	1304.41	538.148											77	0.25761	0.117399	0.142225	0.121951	0.172196	0.064097	0.062762	0.088646	0.068507	0.064356	0.055437	0.384709
						8.75	643.928	676.945	1621.71		142.197	555.328	1063.52	1580.63	1051.55	1978.97	296.923	1215.31	1160.23	765.213	711.272	698.022	331.365	856.014	1381.71	514.139											77.5	0.307477	0.084806	0.121977	0.10948	0.186947	0.068749	0.072534	0.06169	0.077709	0.065642	0.071425	0.303129
						8.8068	828.861	698.13	1728.31		145	726.906	1094.91	1739.85	1107.45	2341.32	308.49	1022.29	1191.25	664.058	768.302	748.186	847.412	652.035	1509.11	540.513											78	0.311314	0.098032	0.117762	0.096163	0.19458	0.069066	0.061668	0.07135	0.07277	0.065908	0.067017	0.419949
						8.8636	589	747.567	1591.11			682.423	962.92	1865.12	1004.99	2047.17	424.277	1093.76	1265.52	777.092	783.731	625.488	572.354	715.062	1462.04	517.184											78.5	0.268417	0.102105	0.137542	0.122633	0.171455	0.066031	0.062792	0.077004	0.072	0.064102	0.06052	0.326606
						8.9204	360.397	835.905	1560.17			638.457	1072.73	1598.68	1067.36	2078.12	438.306	1033.75	1365.54	924.932	1036.41	679.293	574.786	797.394	1376.34	425.913											79	0.251231	0.146362	0.110937	0.104549	0.150978	0.064111	0.072344	0.072378	0.070496	0.056335	0.05766	0.307892
						8.9772	354.667	853.65	1715.01			611.512	1253	1843.66	1006.17	1938.52	528.957	807.704	1564.08	859.469	1194.41	853.086	628.089	674.569	1417.01	513.477											79.5	0.290173	0.082131	0.119037	0.120268	0.155994	0.067872	0.065816	0.071688	0.069949	0.064727	0.056402	0.299288
						9.0341	245.038	830.562	1578.2			753.723	1092.44	1901.36	1135.76	1830.17	819.676	969.761	1269.99	926.597	965.431	926.521	729.897	585.069	1269.16	567.124											80	0.287962	0.112418	0.135546	0.123448	0.178765	0.067761	0.06667	0.067897	0.075318	0.068439	0.068475	0.332804
						9.0909	290	757.543	1122.83			854.576	1001.12	1665.06	1172.58	1749.13	581.844	893.734	1336.09	967.434	1020.83	1074.21	977.237	574.56	1055.12	467.418											80.5	0.176006	0.10989	0.144378	0.132141	0.185629	0.064276	0.07194	0.082438	0.073714	0.068983	0.06286	0.313627
						9.1477	293.063	680.687	1216.81			843.695	908.464	1495.22	1129.94	1599.97	608.397	821.4	1272.28	827.777	953.58	1190.83	683.783	620.122	1144.45	570.908											81	0.348838	0.146369	0.120956	0.124846	0.182091	0.071214	0.063176	0.064525	0.067715	0.065054	0.068386	0.243495
						9.2045	310.759	628.286	1192.12			797.739	796.796	1589.34	833.784	1702.76	702.544	1007.57	1162.31	719.024	1060.62	1443.52	824.306	534.421	1101.38	649.067											81.5	0.494702	0.133203	0.127511	0.12393	0.183131	0.064958	0.065289	0.072653	0.071491	0.079034	0.066672	0.231746
						9.2613	175.177	627.34	839.781			745.189	778.578	1476.5	763.459	1520.28	585.758	1107.73	1100.01	622.203	984.526	1542.67	728.674	584.15	1114.01	534.209											82	0.307577	0.116056	0.144276	0.151155	0.16686	0.060708	0.070245	0.076663	0.068459	0.068577	0.06071	0.288163
						9.3182	163.426	720.673	921.024			689.634	800.261	1123.31	700.343	1735.48	728.268	1094.24	891.278	748.4	939.906	1351.43	910.192	660.381	1117.38	453.078											82.5	0.221712	0.129028	0.137154	0.0981	0.183706	0.057584	0.069538	0.064123	0.075966	0.06719	0.0685	0.307122
						9.375	245.734	737.327	747.966			808.6	624.039	1189.73	644.767	1903.06	800.872	1143.33	999.146	736.488	762.271	1061.3	838.741	698.967	1177.01	438.064											83	0.203031	0.128644	0.141973	0.13193	0.1743	0.069805	0.065568	0.075053	0.066266	0.069105	0.058963	0.443769
						9.4318	329.489	661.199	838.087			834.48	738.173	1228.75	583.968	1864.11	862.339	1367.28	900.097	800.349	891.244	1307.13	710.312	689.068	1163.62	598.102											83.5	0.227833	0.118847	0.11258	0.113871	0.167489	0.067407	0.074171	0.064192	0.066559	0.062868	0.05571	0.256783
						9.4886	145	737.358	683.952			804.363	752.39	1080.33	594.835	2193.58	917.745	1383.93	1006.92	694.317	1037.87	1438	729.986	858.945	950.119	554.289											84	0.243635	0.091117	0.114707	0.10804	0.161319	0.05822	0.060974	0.068341	0.072257	0.070302	0.058346	0.363743
						9.5454	234.633	844.36	448.411			788.87	889.693	1153.43	444.184	1772.33	1103.55	1299.8	827.755	716.607	983.946	1457.09	900.465	684.876	974.634	363.036											84.5	0.477518	0.116407	0.136585	0.11157	0.175856	0.068159	0.055965	0.067724	0.07477	0.062791	0.063958	0.152884
						9.6022	192.19	861.198	389.335			860.736	811.785	1123.95	468.95	1404.62	1093.75	1362.7	815.45	759.937	848.3	1429.14	603.967	742.105	1308	526.028											85	0.337152	0.148222	0.130903	0.118994	0.187371	0.062649	0.071531	0.079399	0.069211	0.061622	0.057236	0.275592
						9.6591	290	869.872	373.452			902.495	667.848	1337.01	404.685	1435.71	988.206	1526.2	680.263	706.826	658.704	1229.89	624.967	640.659	983.847	466.886											85.5	0.298384	0.160147	0.095399	0.120148	0.17377	0.0555	0.063313	0.075688	0.072287	0.06497	0.055794	0.310328
						9.7159	275.316	925.448	356.556			941.326	711.706	1183.18	357.33	1454.7	1293.59	1603.91	881.579	763.824	733.8	1237.06	568.663	636.48	963.294	409.721											86	0.154339	0.100199	0.121118	0.108335	0.159747	0.062727	0.069132	0.073311	0.076944	0.0686	0.069328	0.392786
						9.7727	208.553	875.541	253.915			940.297	705.868	1291.08	350.675	1597.1	1234.12	1689.59	1070.6	854.745	525.317	1620.71	549.847	690.835	1109.07	355.417											86.5	0.21624	0.12951	0.12593	0.122762	0.151579	0.054952	0.065822	0.067504	0.064919	0.06696	0.060888	0.229732
						9.8295	148.903	898.082	274.271			891.962	585.058	1170.99	434.678	1669.18	1089.66	1749.34	958.076	684.426	708.027	1598.1	704.705	870.647	1077.81	376.705											87	0.224706	0.10941	0.13636	0.107951	0.170905	0.064377	0.062791	0.073687	0.069155	0.063203	0.076785	0.246378
						9.8863	145	999.268	329.22			1044.43	527.571	1250.58	325.893	1766.38	1111.38	1680.45	808.319	738.631	792.702	1464.51	422.125	609.13	1131.92	495.137											87.5	0.202484	0.179622	0.125025	0.128521	0.181355	0.055776	0.067518	0.064819	0.07946	0.064568	0.067444	0.357746
						9.9432	112.54	1075.75	208.463			1299.15	517.171	1119.71	268.67	1538.24	1328.94	1648.44	773.458	835.674	669.37	1321.38	438.914	516.243	1197.53	330.973											88	0.187595	0.151587	0.119986	0.111473	0.17667	0.051214	0.063323	0.062355	0.073716	0.070481	0.085149	0.355746
						10	145	1065.06	212.068			1012.01	667.093	1149.79	326.656	1569.21	1041.08	1485.09	808.686	813.793	813.014	1368.98	506.967	630.919	1210.84	413.166											88.5	0.185825	0.132331	0.135837	0.109075	0.168842	0.061294	0.057322	0.064721	0.068073	0.067482	0.060851	0.248843
						10.0568	96	927.08	228.263			1136.4	622.429	1279.7	366.051	1471.5	1308.67	1531.36	747.92	695.961	700.583	1637.91	341.187	558.809	1140.47	350.432											89	0.210385	0.123485	0.123081	0.11661	0.162573	0.058833	0.067278	0.067972	0.068851	0.077394	0.05847	0.268463
						10.1136	168.291	867.666	210.351			1024.2	615.668	1068.39	312.708	1522.45	1200.2	1524.58	672.185	656.152	775.015	1663.78	439.148	406.619	1153.85	264.451											89.5	0.270092	0.163731	0.13003	0.11241	0.179214	0.061382	0.066409	0.073201	0.073371	0.073887	0.058543	0.221329
						10.1704	151.662	813.993	184.414			999.826	655.32	1019.81	383.289	1327.13	1011.03	1194.63	626.081	683.823	659.922	1527.3	564.961	503.534	1174.47	227.117											90	0.339597	0.177794	0.126046	0.123617	0.178545	0.057686	0.063488	0.068809	0.072894	0.060585	0.064473	0.174438
						10.2272	162.62	673.265	135.302			897.417	719.436	1183.75	287.651	1464.06	1033.91	1306.61	857.858	734.633	619.978	1483.44	413.318	474.05	1193.85	295.034											90.5	0.314602	0.119854	0.118946	0.119272	0.178057	0.056233	0.069446	0.067215	0.070788	0.067685	0.069915	0.292114
						10.2841	129.907	661.853	186.512			952.332	718.322	1198.65	303.023	1346.8	958.414	1431.12	896.587	699.348	665.667	1538.4	566.409	609.033	1341.56	350.004											91	0.279221	0.175577	0.148462	0.120298	0.180453	0.06468	0.069422	0.07302	0.06741	0.063897	0.063053	0.257705
						10.3409	84.051	652.875	225.67			867.156	718.953	1102.66	315.554	1288.68	869.7	1185.97	788.451	711.913	608.887	1483.22	438.187	733.955	1463.18	317.085											91.5	0.237868	0.080403	0.109865	0.140254	0.169349	0.064354	0.072894	0.073657	0.072788	0.063418	0.072102	0.417057
						10.3977	223.582	869.208	153.199			1026.71	689.467	999.573	379	1354.75	810.183	1020.49	863.387	841.346	682.772	1390.38	533	760.299	1033.85	362.061											92	0.219781	0.136429	0.144785	0.11374	0.168381	0.0588	0.067801	0.066732	0.065767	0.062685	0.055345	0.278674
						10.4545	180.312	847.958	170.72			1319.27	612.849	839.468	336.808	1321.99	680.236	802.33	1041.66	692.319	700.251	1292.9	562.415	601.025	967.361	489.238											92.5	0.167824	0.084994	0.15066	0.093375	0.180119	0.062835	0.059566	0.061232	0.070093	0.068401	0.056642	0.378973
						10.5113	141.485	781.191	208.709			1174.07	592.081	837.411	244.22	1060.83	497.255	656.738	1289.59	607.028	620.929	1155.99	456.571	705.746	884.48	406.862											93	0.291445	0.106278	0.106228	0.125933	0.176125	0.063789	0.065779	0.073554	0.064192	0.062435	0.061099	0.254552
						10.5682	144.38	764.881	144.61			1071.25	695.502	777.985	338.301	1360.25	503.023	751.506	1240.18	666.52	698.51	1199.9	516.485	615.187	741.367	310.327											93.5	0.180792	0.128733	0.12087	0.134241	0.177824	0.065855	0.070997	0.073097	0.074168	0.065338	0.080319	0.271356
						10.625	149.502	829.01	115.234			1030.1	750.174	892.249	231.182	1443.74	537.376	658.772	1091.49	652.648	694.519	1106.07	572.24	492.519	666.374	384.657											94	0.371966	0.097032	0.144403	0.102926	0.19357	0.058318	0.069941	0.077946	0.072133	0.070129	0.063012	0.338309
						10.6818	53.063	916.709	179.929			994.708	767.704	879.451	213.52	1320.82	438.526	558.739	1335.58	578.751	612.39	1199.03	408.432	484	541.675	293.851											94.5	0.221577	0.132577	0.124301	0.115441	0.187186	0.065705	0.075352	0.073609	0.074121	0.070027	0.060349	0.275008
						10.7386	136.937	843.08	160.588			687.014	660.422	908.672	207.373	1105.88	655.982	538	990.006	592.367	713.89	1325.45	376.967	648.267	469.801	461.095											95	0.433327	0.152128	0.151978	0.140143	0.177716	0.059889	0.069733	0.075036	0.074497	0.07619	0.065426	0.303886
						10.7954	145	801.825	194.669			551.046	579.152	969.072	249.147	1344.34	709.215	506.427	992.61	651.027	584	1122.28	387	605.987	494.702	467.999											95.5	0.319746	0.130158	0.120535	0.126151	0.153392	0.053864	0.075187	0.068525	0.06213	0.064409	0.06582	0.345635
						10.8522	165.578	943.993	200.457			634.827	597.061	1216.48	239.374	1391.24	547.75	471.585	1189.17	631.181	582.004	993.159	504.535	558.853	293.327	369.705											96	0.372083	0.099687	0.132992	0.111035	0.160339	0.062325	0.069812	0.062247	0.070584	0.081202	0.071723	0.304638
						10.9091	96	861.256	191.124			496.519	640.104	1412.56	145.753	1430.01	652.993	592.08	1264.05	519.115	687.186	1072.66	430.922	696.517	337.793	673.214											96.5	0.168897	0.071947	0.122368	0.109524	0.170166	0.064137	0.06719	0.078485	0.070949	0.069496	0.057976	0.259142
						10.9659	115.641	603.916	228.113			511.159	623.359	949.505	233.666	1216.3	777.021	542.983	1258.96	583.122	666.804	1046.27	432.098	655.545	327.136	435.637											97	0.361807	0.131005	0.101488	0.119201	0.1571	0.057673	0.069891	0.066936	0.07618	0.067531	0.068593	0.311858
						11.0227	96	549.463	176.082			347.916	636.342	1264.67	247	1326.36	840.719	424.378	1037.24	638.791	744.195	1143.67	464.209	601.553	339.869	362.935											97.5	0.369544	0.160771	0.166701	0.114702	0.160194	0.072174	0.075485	0.063703	0.078576	0.074163	0.074928	0.342121
						11.0795	96	536.134	145			273.21	644.339	1412.14	196.251	1321.78	812.093	404.197	1161.66	753.8	691.454	812.22	505.616	723.612	271.71	431.622											98	0.249138	0.082416	0.131057	0.145768	0.162012	0.055488	0.068378	0.072984	0.073866	0.070713	0.064512	0.290911
						11.1363	68.253	354.914	163.631			403.033	638.055	1129.16	173.368	1289.53	761.25	386.281	893.763	734.231	724.208	806.203	642.944	665.532	297.892	443.572											98.5	0.389457	0.185807	0.137906	0.168986	0.197963	0.066658	0.066745	0.072071	0.074225	0.064565	0.061811	0.261851
						11.1932	113.781	297.849	208.829			356.983	654.047	1220.08	215.23	1344.17	793.45	414.516	706.263	870.738	652.073	476.838	772.365	1078.25	241.921	404.443											99	0.445798	0.163469	0.107051	0.126231	0.175712	0.05621	0.06389	0.07087	0.07186	0.060326	0.067436	0.206627
						11.25	130.114	259.829	227.478			267.458	599.86	1135.05	169.242	942.697	671.564	342.637	666.936	887.833	527.868	418.631	631.306	719.377	207.06	471.713											99.5	0.252965	0.089726	0.109106	0.121808	0.164748	0.066554	0.063537	0.072726	0.070207	0.077865	0.071834	0.30924
						11.3068	156.747	254.279	224.568			289.816	644.892	1156.56	162.018	1016.29	611.473	264.458	599.442	1002.46	667.671	415.379	1067.7	715.739	224.03	518.165											100	0.381854	0.075703	0.152813	0.140202	0.161302	0.05909	0.076325	0.080735	0.062294	0.058642	0.062338	0.235552
						11.3636	96	196.836	193.821			164.773	616.723	1299.77	235.818	871.298	536.719	307.723	580.688	869.843	753.119	373.895	631.421	905.014	270.285	498.244											100.5	0.38361	0.106777	0.127135	0.132306	0.173098	0.058306	0.071012	0.072047	0.069405	0.065889	0.059423	0.287504
						11.4204	102.203	191.854	204.177			264.134	561.741	1447.13	293.315	693.48	615.985	287.226	321.224	1012.15	708.564	301.518	739.799	636.519	227.503	479.413											101	0.136094	0.127862	0.105186	0.132443	0.165383	0.064512	0.061446	0.082723	0.062883	0.067557	0.071535	0.372504
						11.4772	141.692	175.167	145			293.77	584.074	1340.59	213.91	468.907	552.098	300.403	404.653	1024.56	660.352	278.889	1075.46	722.059	199.471	445.062											101.5	0.263344	0.106362	0.098315	0.108038	0.186221	0.06385	0.069744	0.077193	0.065376	0.070215	0.064181	0.237284
						11.5341	48.405	187.572	138.259			217.139	629.17	1150.3	166.322	642.087	675.44	233.911	445.535	1086.17	694	247.508	916.908	793.065	227.316	559.501											102	0.257583	0.076523	0.118614	0.094144	0.189144	0.066971	0.061326	0.076631	0.065877	0.065734	0.063032	0.278037
						11.5909	152.177	116.591	167.304			207.59	857.853	1149.53	133.381	557.055	703.835	194.8	321.98	1021.9	722.778	179.838	898.362	804.474	200.42	533.936											102.5	0.201251	0.095361	0.138892	0.075255	0.172729	0.063121	0.070307	0.074333	0.066432	0.067042	0.064574	0.359101
						11.6477	139.624	145	261.441			160.656	842.598	1166.52	181.208	404.472	767.158	184.159	250.796	902.059	763.888	212.984	1040.08	616.479	235.438	455.512											103	0.141742	0.070887	0.129017	0.102504	0.182684	0.05634	0.071509	0.075649	0.073592	0.072213	0.052047	0.323558
						11.7045	209.257	145.685	170.83			200.965	608.478	1216.47	148.112	317.105	910.126	137.004	230.809	889.348	752.096	156.172	902.17	579.914	180.951	444.616											103.5	0.156903	0.17162	0.137095	0.134088	0.184049	0.053803	0.066437	0.071889	0.067252	0.072016	0.053848	0.480624
						11.7613	85.063	148.605	123.339			244.97	632.807	991.048	112.899	281.412	938.413	89.927	228.36	746.587	722.901	189.166	810.627	620.222	71.536	452.646											104	0.208813	0.174031	0.142784	0.097728	0.17576	0.060203	0.064815	0.081818	0.069692	0.060241	0.048527	0.386956
						11.8182	96	158.251	98.579			173.878	676.253	1147.48	116.633	286.922	980.953	103.39	234.411	656.506	737.656	185.072	599.343	797.275	190.899	460.334											104.5	0.231576	0.030051	0.175598	0.121337	0.168326	0.063979	0.068332	0.067875	0.069637	0.064921	0.081586	0.396349
						11.875	239.831	156.361	193.728			206.696	721.365	1449.25	180.029	422.304	1058.42	189.443	160.822	746.817	927	148.823	623.173	810.831	114.475	488.002											105	0.265367	0.109449	0.125328	0.125412	0.174578	0.058582	0.071505	0.078451	0.060655	0.076224	0.065257	0.319252
						11.9318	96	106.889	166.538			267.596	691.4	1438.23	144.073	359.489	1016.03	98	182.956	595.556	1093.83	142.107	496.967	675.504	143.979	533.225											105.5	0.438587	0.043397	0.09487	0.128134	0.17071	0.060202	0.066834	0.066283	0.060778	0.063102	0.067861	0.288345
						11.9886	122.257	86.592	122.158			220.945	662.77	1410.19	142.817	319.399	1253.47	143.148	155.604	508.659	1093.2	118.449	455.9	613.68	154.645	536.893											106	0.365647	0.032263	0.121076	0.105435	0.172194	0.058044	0.066603	0.061917	0.072801	0.062214	0.0583	0.249663
						12.0454	96	86.862	200.115			175.185	726.691	1367.14	146.23	245.005	1158.93	99.057	122.83	465.174	1036.69	122.727	339	667.694	135.941	488.152											106.5	0.1583	0.111777	0.157404	0.135816	0.187915	0.069018	0.065618	0.070821	0.073966	0.074832	0.067151	0.222464
						12.1022	172.949	114.302	245.454			170.273	787.119	1438.38	115.701	202.14	1533.7	118.733	120.006	569.007	1138.65	129.461	358.613	525.075	142.101	510.884											107	0.248851	0.109415	0.137259	0.091667	0.187573	0.073701	0.064844	0.072776	0.068578	0.06483	0.071427	0.299681
						12.1591	48	105.826	282.519			210.692	737.363	1416.43	101.314	214.795	1499.67	129.325	136.667	499.577	1077.8	154.858	321.12	472.964	130.24	461.757											107.5	0.430862	0.185749	0.131653	0.117816	0.180011	0.072365	0.070836	0.065541	0.075224	0.07208	0.068362	0.263922
						12.2159	163.941	145.556	165.799			193	721.246	1112.72	109.471	199.167	1416.09	135.96	121.32	406.225	1113.14	69.513	237.114	459.341	182.555	371.333											108	0.280049	0.231553	0.142711	0.116032	0.173862	0.067374	0.064131	0.074915	0.076015	0.065359	0.054725	0.19557
						12.2727	133.215	146.873	113.607			172.013	758.487	1253.45	135.515	150.571	1340.63	209.029	104.051	397.463	968.942	51.398	273.518	588.926	145.987	429.996											108.5	0.301709	0.056665	0.13908	0.134093	0.175959	0.065423	0.056639	0.07728	0.06511	0.064797	0.056065	0.180123
						12.3295	74.308	86.201	114.769			157.381	802.955	1021.67	90.193	149.475	1500.58	108.119	103.418	421.281	964.497	92	195.641	635.253	89.721	400.778											109	0.313706	0.178951	0.149959	0.128993	0.180011	0.067466	0.064049	0.061122	0.069545	0.065804	0.066868	0.540932
						12.3863	139.004	155.762	267.84			185.407	801.891	1000.1	85.989	108.004	1587.69	89.874	124.087	369.213	1022.41	83.118	316.206	631.15	105.575	388.163											109.5	0.333541	0.142938	0.154589	0.103959	0.166808	0.065425	0.062974	0.06869	0.074223	0.056306	0.069991	0.260615
						12.4431	51.038	163.12	159.219			145.124	795.957	814.4	113.704	169.467	1726.93	102.071	106.839	305.734	1152.95	133.027	242	467.764	96	388.259											110	0.313529	0.071247	0.14875	0.153177	0.168858	0.054953	0.066124	0.061525	0.074519	0.060019	0.058474	0.215637
						12.5	144.793	124.335	145			96	801.171	510.754	96	192.865	1623.23	120.565	94.259	377.148	1098.54	149.929	218.251	508.312	131.044	413.855											110.5	0.397634	0.033785	0.132846	0.120348	0.15212	0.068683	0.060247	0.072755	0.066421	0.067436	0.057816	0.213489
						12.5568	96	161.453	145			85.537	705.847	553.152	125.463	209.678	1397.98	129.61	72.817	457.097	852.406	96.785	145	550.747	119.195	556.805											111	0.331879	0.303297	0.150448	0.12545	0.172879	0.056466	0.066634	0.063053	0.068046	0.074523	0.058795	0.254008
						12.6136	101.582	117.702	145			49.478	614.411	516.992	156.982	180.49	1302.78	76.648	96.09	409.97	1016.34	65.841	165.858	606.335	95.445	654.323											111.5	0.149711	0.192931	0.136802	0.107085	0.176314	0.064983	0.070271	0.068773	0.073052	0.071704	0.06514	0.25226
						12.6704	87.696	145	102.04			54.982	578.439	384.732	96.71	266.054	1398.38	92.643	124.785	337.553	825.047	69.833	157.83	601.786	111.458	575.103											112	0.15527	0.15844	0.134936	0.118653	0.202341	0.067073	0.063416	0.065421	0.072009	0.064468	0.069253	0.301661
						12.7272	159.35	159.984	81.737			96	731.277	303.401	96	229.475	1208.98	100.563	104.297	242.51	619.674	72.137	163.451	544.938	113.437	688.448											112.5	0.26876	0.166074	0.147425	0.14355	0.193988	0.059357	0.06713	0.084583	0.070367	0.073902	0.067339	0.321032
						12.7841	96	181.735	122.929			96	700.102	306.003	61.636	206.429	1154.4	67.714	76.129	287.627	580.198	96	127.393	492.651	53.022	712.664											113	0.264787	0.120892	0.140777	0.151285	0.198592	0.065333	0.070452	0.065878	0.070993	0.079361	0.059602	0.293957
						12.8409	127.84	131.156	147.663			60.866	696.305	229.431	64.931	139.537	959.301	48.938	75.216	225.463	483.321	96	145	429.867	48.363	713.253											113.5	0.731446	0.222914	0.165608	0.115592	0.199343	0.055818	0.069198	0.071314	0.065216	0.063129	0.059426	0.447757
						12.8977	96	96	126.937			99.583	725.544	263.604	88.014	157.611	933.932	55.895	96	164.895	363.271	135.46	129.85	275.51	133.058	734.489											114	0.102349	0.11405	0.13776	0.10577	0.172335	0.057991	0.065842	0.067024	0.075131	0.071316	0.073864	0.354192
						12.9545	96	100.769	139.781			88.312	710.435	146.858	87.588	139.589	748.077	55.184	99.34	178.9	427.96	87.671	123.56	297.874	56.854	601.154											114.5	0.38629	0.171125	0.14082	0.114717	0.190868	0.073365	0.065826	0.079365	0.07198	0.064887	0.066058	0.495176
						13.0113	96	109.689	134.032			61.862	867.918	190.537	64.603	150.066	721.014	44.648	68.377	295.587	393.255	89.797	171.423	271.136	119.293	573.995											115	0.310398	0.071301	0.109918	0.124513	0.183207	0.071932	0.065826	0.078354	0.0672	0.078688	0.059043	0.239935
						13.0681	76.152	108.784	100.355			72.497	939.683	193	95.147	188.914	471.853	13.751	50.09	248.647	226.909	96	107.465	211.517	66.126	605.008											115.5	0.1419	0.09938	0.159425	0.191036	0.168523	0.068034	0.067931	0.063525	0.06571	0.066651	0.075027	0.304304
						13.125	127.633	118.551	108.472			96	979.826	262.303	76.859	176.425	338.19	51.2	82.305	337.941	273.296	96	106.237	186.371	54.346	726.754											116	0.221013	0.334797	0.098495	0.144357	0.182426	0.064109	0.072651	0.068489	0.077324	0.063925	0.068341	0.317484
						13.1818	130.527	133.631	182.999			100.987	1196.37	275.981	69.821	136.08	179.536	76.952	59.139	218.54	195.242	145.58	87.175	175.198	81.177	659.891											116.5	0.239066	0.104637	0.13642	0.140977	0.182618	0.075631	0.07482	0.069559	0.068078	0.07165	0.066751	0.289173
						13.2386	133.422	96.302	145.157			133.922	1395.41	174.51	65.649	163.417	166.361	85.471	44.674	227.363	232.385	128.575	152.621	235.88	96	533.043											117	0.237465	0.2296	0.109446	0.140279	0.168738	0.057372	0.064214	0.058964	0.070302	0.061909	0.04615	0.341757
						13.2954	56.506	106.602	115.003			127.025	1404.7	184.46	96.521	201.836	222.406	58.384	74.438	66.644	262.344	96	102.552	208.221	96	675.467											117.5	0.177494	0.187039	0.123575	0.114327	0.177874	0.067879	0.064676	0.063216	0.073857	0.067282	0.065793	0.300573
						13.3522	59.46	140.215	101.767			164.795	1469.12	201.895	123.829	152.303	272.378	93.714	79.318	164.805	184.073	92	58.538	120.5	98.239	702.127											118	0.192175	0.200883	0.150065	0.14275	0.166717	0.067166	0.06392	0.071964	0.074116	0.06688	0.055906	0.255053
						13.4091	96	95.259	131.745			79.399	1595.47	162.516	100.167	119.971	133.831	48.145	40.596	129.336	145.505	54.154	52.011	110.906	108.524	645.807											118.5	0.338315	0.075622	0.125976	0.115366	0.183733	0.065213	0.075327	0.071876	0.074525	0.072848	0.061539	0.206414
						13.4659	48	70.892	171.976			95.804	1647.36	134.803	84.93	145	149.275	50.22	51.853	111.956	140.115	74.861	145	85.855	104.286	381.392											119	0.252028	0.082414	0.122157	0.106719	0.174339	0.068165	0.067798	0.068487	0.073879	0.066584	0.064572	0.309818
						13.5227		107.978	178.404			84.088	1640.15	241.143	126.846	143.713	108.314	112.919	66.361	165.814	162.611	79.946	189.758	111.603	79.585	316.345											119.5	0.510625		0.14809	0.126921	0.189314	0.072155	0.059038	0.0694	0.059194	0.069643	0.058827	0.256111
						13.5795		127.957	164.556			83.835	1623.35	96	103.445	148.142	96.741	122.585	48.485	181.478	145	84.668	192.189	142.019	69.088	247.063											120	0.215127		0.154526	0.120558	0.17902	0.065531	0.063965	0.074549	0.066091	0.061341	0.064388	0.395997
						13.6363		100.608	182.441			122.655	1687.2	96	84.675	145.716	136.794	99.782	81.908	129.239	153.061	92.038	96	164.849	69.713	325.995											120	0.215127				0.154526		0.120558		0.17902
						13.6931		177.781	163.168			97.396	1953.23	55.899	96	114.517	104.674	48.557	82.669	106.306	135.515	60.003	96	167.313	48.284	228.007
						13.75		107.356	131.483			102.196	1994.76	73.305	96	96.28	188.158	123.752	25.728	129.4	120.216	136.528	96	137.761	67.262	239.3
						13.8068		145	115.84			84.397	1584.13	83.402	96	63.596	124.563	88.224	49.798	135.481	96.167	76.835	96	133.961	96	239.262
						13.8636		133.956	106.117			154.854	1452.1	109.425	109.934	82.933	151.301	55.619	75.389	89.267	96	63.74	96	126.367	95.716	197.612
						13.9204		115.16	156.563			189.62	1375.6	112.091	102.661	66.907	109.376	76.444	65.515	98.646	103.635	41.226	102.961	125.713	50.272	216.178
						13.9772		180	147.113			103.194	1484.07	99.283	55.295	106.617	77.874	77.714	87.597	118.489	103.704	80.212	128.788	96.998	117.771	154.64
						14.0341		137.078	193			135.913	1619.28	88.411	96.574	128.942	104.467	64.762	76.357	110.559	127.85	71.994	135.582	129.072	138.107	131.008
						14.0909		99.352				141.049	1667.16	110.572	126.234	148.785	145	72.011	48	119.691	148.718	60.991	145	157.915	110.7	131.431
						14.1477		125.293				154.504	1486.55	120.623	106.608	88.278	120.425	111.959	48	121.882	105.179	73.062	84.368	96	83.214	94.52
						14.2045		132.556				109.942	1510.94	62.385	126.478	50.618	130.355	99.33	48	90.19	34.039	92.384	109.103	96	49.781	53.21
						14.2613		135.821				102.169	1563.95	95.777	114.987	78.455	102.947	76.307	79.912	89.593	34.111	61.74	96	96	67.234	70.602
						14.3181		162.28				101.95	1428.18	71.552	84.165	74.965	91.911	76.8	61.418	123.32	100.756	93.027	80.758	109.642	122.486	97.586
						14.375		130.887				127.36	1401.39	87.558	74.08	75.325	76.802	60.684	94.449	100.021	123.891	60.746	96	159.895	82.589	100.002
						14.4318		74.866				139.425	1181.66	55.944	100.17	91.155	100.165	62.941	83.882	99.504	50.354	76.885	65.649	149.203	59.791	86.512
						14.4886		96				119.883	1336.67	72.554	117.805	73.282	103.615	59.102	92.832	125.231	88.72	82.317	96	99.564	81.506	49.328
						14.5454		98.826				107.393	1701.57	80.652	64.826	67.079	138.569	85.058	141.665	112.663	60.126	87.429	48	140.215	96	73.426
						14.6022		112.294				116.371	1414.99	42.059	108.838	87.456	142.344	64.762	114.53	94.24	48	77.735	145	96.052	86.551	50.977
						14.6591		138.502				96.007	1524.49	48.501	173.028	112.318	98.62	77.714	83.799	61.251	61.317	85.249	48	48	109.401	60
						14.7159		136.289				96	1455.63	70.776	144.569	106.767	81.063	84.978	81.151	86.145	53.909	80.362	120.159	48.562	88.471	96.989
						14.7727		112.668				96	1193.27	62.123	88.03	96	89.084	55.619	87.169	110.385	48	86.678	96	68.287	54.817	117.427
						14.8295		169.506				71.476	1171.1	75.141	120.186	89.64	165.834	68.963	59.494	95.053	61.137	96.965	96	122.513	74.056	58.559
						14.8863		103.171				106.365	1154.08	32.695	116.073	51.503	83.804	63.115	73.153	178.752	95.747	48.425	75.276	122.896	50.272	93.61
						14.9431		131.852				108.644	938.52	48	109.577	53.508	79.805	95.115	139.916	103.146	73.102	48	76.479	128.731	95.726	69.668
						15		122.79				103.678	645.841	27.204	73.145	96.77	57.465	85.891	97.977	156.092	48.074	61.548	77.682	134.488	66.873	109.239
						15.0568		129.558				59.319	565.141	83.75	88.16	56.244	74.463	74.29	70.909	110.157	92.343	53.947	17.114	65.34	51.64	102.891
						15.1136		123.125				133.329	455.117	91.152	116.489	127.925	92.942	49.6	95.17	87.356	111.92	82.407	48	97.298	88.047	48.356
						15.1704		116.569				132.987	431.056	88.218	62.577	79.741	96	52.219	110.276	90.608	108.656	80.809	111.014	91.222	96	74.791
						15.2272		103.311				143.204	451.155	71.803	64.742	85.195	57.55	54.452	136.217	70.079	82.736	84.486	48	76.103	86.965	53.953
						15.2841		145				142.033	295.236	48	50.639	93.577	60.709	84.114	59.481	48.084	71.286	93.575	60.301	48	113.362	43.163
						15.3409		140				119.387	225.034	48.649	65.457	61.628	74.073	32.327	88.932	110.692	53.152	100.482	133.671	51.976	117.792	48
						15.3977		101.292				90.554	209.847	75.227	40.063	88.611	90.553	91.692	48.996	105.893	114.301	63.793	57.894	87.659	108.524	66.186
						15.4545		67.789				39.8	224.041	48	64.436	108.931	59.56	69.174	83.049	89.266	78.646	115.857	56.691	90.894	93.807	122.367
						15.5113		99.267				107.582	207.252	41.951	51.444	61.66	86.073	48	54.25	69.706	77.78	85.303	137.357	56.763	56.805	53.979
						15.5681		95.775				141.936	216.679	66.016	28.689	140.227	135.764	27.914	51.062	105.191	48.181	103.143	48	127.017	74.831	72.156
						15.625		105.123				96	156.107	48	28.041	151.168	113.317	70.184	54.271	97.478	71.335	98.755	53.081	94.451	127.604	49.393
						15.6818		132.391					204.306	70.169	65.36	87.302	106.627	97.445	48	87.473	95.553	70.776	48	169.483	93.257	73.558
						15.7386		100.579					239.421	44.606	69.327	110.948	129.391	79.971	52.15	121.793	63.898	48	93.326	131.707	65.715	55.338
						15.7954		126.34					214.289	78.115	43.216	69.684	104.174	47.238	93.233	90.391	79.832	48	190.028	139.027	49.608	60.733
						15.8522		97.482					176.392	70.093	23.35	132.533	181.592	39.38	85.51	78.599	100.396	99.914	96	138.465	72.049	102.951
						15.909		103.654					134.865	68.212	11.746	73.993	128.447	39.111	88.308	89.262	111.706	96.881	96	56.996	97.341	78.468
						15.9659		121.356					156.85	72.986	10.539	91.912	116.068	20.078	53.557	50.482	159.476	87.441	50.139	48	59.937	48
						16.0227		124.004					172.855	51.805	2.469	56.025	120.703	35.657	48	55.988	112.002	56.819	48	48	90.126	63.07
						16.0795		109.173					130.697	54.339	27.121	55.433	91.751	10.514	48	67.919	13.768	51.722	96	64.419	75.55	92.989
						16.1363		85.868					111.231	61.808	0	64.305	59.655	44.829	51.735	55.608	48	93.012	96	48.196	60.213	95.812
						16.1931		108.222					142.216	54.413	0	125.172	88.775	37.224	92.818	52.025	48	95.564	96	51.496	90.102	71.286
						16.25		147.126					127.573	70.599	38.763	84.987	103.784	0	92.392	48	55.547	79.67	48	53.617	114.846	84.651
						16.3068		223.493					76.916	48.425	16.99	117.242	72.53	0	65.014	49.399	53.433	133.982	57.359	81.811	105.8	57.674
						16.3636		97.4					77.732	101.396	9.183	103.983	74.001	0.98	72.015	54.363	115.97	88.812	85.437	49.76	64.559	48
						16.4204		104.2					115.22	91.819	15.505	67.439	79.791	46.788	50.667	53.948	84.963	60.743	59.766	66.668	64.473	48
						16.4772		133.235					119.9	52.918	26.062	96	68.964	47.42	48	66.259	72.931	73.912	48	146.464	71.122	69.363
						16.534		95.094					111.633	85.894	6e-11	87.753	73.647	4.114	47.837	66.263	67.314	79.031	33.827	103.736	96.773	25.648
						16.5909		85.311					122.721	76.8		122.77	61.822	8.678	49.689	87.182	59.573	90.587	80.624	53.106	130.213	67.264
						16.6477		139.545					178.728	80.837		92.201	88.335	2.554	48	53.41	69.305	94.459	48	90.383	99.993	87.814
						16.7045		73.849					123.196	109.393		77.577	150.355	28.8	48	64.244	30.122	79.334	48	54.128	77.661	58.001
						16.7613		118.556					108	90.956		123.05	217.26	19.048	48	54.418	48	111.12	96	89.362	48	49.575
						16.8181		110.938					142.704	77.38		160.567	115.951	1.683	57.117	50.958	66.876	96.345	68.189	82.093	52.773	54.003
						16.875		48					118.085	49.74		159.281	140.83	0	104.768	54.152	53.479	127.729	96	87.064	59.862	54.075
						16.9318		52.597					67.636	48		160.167	57.895	12.829	89.497	73.265	70.089	63.136	93.663	54.638	93.264	23.37
						16.9886		134.685					104.947	43.347		194.784	132.411	12.793	128.332	53.08	69.574	77.986	72.201	82.509	44.592	69.027
						17.0454		98.333					140.59	43.839		155.747	100.908	0	56.401	48	48	50.421	73.003	54.649	48.161	124.724
						17.1022		142.871					129.22	68.488		127.206	113.573	0	107.15	74.599	58.948	67.115	92.042	48	65.219	80
						17.159		96					104.615	73.635		59.498	143.029	11.697	104.668	59.541	32.464	104.75	48	48	74.136	54.458
						17.2159		96.458					79.934	62.102		104.448	96.898	19.853	66.224	48	32.211	81.182	76.613	85.277	90.666	48
						17.2727		117.146					144.634	48		128.412	99.546	0	39.084	48.674	78.72	50.21	77.816	125.628	90.704	48
						17.3295		164.997					87.65	48		145	89.229	0	48.531	37.072	49.13	72.998	64.98	70.598	70.903	48
						17.3863		112.77					127.431	48		145	96.478	0	79.895	34.472	78.747	105.026	48	55.225	85.207	48
						17.4431		105.685					98.68	55.22		120.919	96	0	83.965	75.536	52.042	121.68	62.574	52.55	63.171	48
						17.5		143.898					113.413	48.076		153.455	104.748	0	88.95	110.994	67.913	48	96	100.824	59.882	33.071
						17.5568		101.98					144.283	48		81.296	111.158	0	129.661	73.221	78.247	49.624	48	117.115	78.107	51.089
						17.6136		79.038					131.838	75.175		83.464	84.942	0	53.882	48	59.634	72.972	48	71.668	76.992	48
						17.6704		110.311					114.004	50.446		72.829	85.083	0	34.398	48	87.877	87.373	48	48.883	98.115	48
						17.7272		106.631					126.564	79.036		83.432	110.805	0	48	58.739	96.936	48.425	127.708	107.567	77.538	48.591
						17.784		96.266					98.988	86.078		80.431	93.949	1.683	48	89.421	58.224	51.51	48	103.141	48	48
						17.8409		141.267					100.551	72.338		71.487	85.696	34.206	43.718	89.131	106.154	119.514	60.429	110.097	56.926	48
						17.8977		96					74.282	56.323		104.661	50.387	2.13e-10	36.253	73.086	96.155	55.308	48	119.18	60.989	49.869
						17.9545							96	79.113		116.481	120.162		45.075	54.646	53.207	62.615	3.744	100.525	48	74.715
						18.0113							102.398	40.326		96	105.049		68.188	113.394	48	63.729	93.46	65.872	52.033	48
						18.0681							127.322	76.913			91.671		19.82	74.896	109.999	94.083	94.663	48.978	66.746	58.235
						18.125							115.296	49.427			107.486		72.305	49.245	96.05	95.278	48	77.106	51.368	53.244
						18.1818							55.654	70.374			77.302		48.03	48	68.211	80.446	48	70.053	48.494	102.95
						18.2386							58.692	51.945			138.025		41.756	76.904	48.255	64.284	48	73.616	110.617	73.668
						18.2954							86.51	48			109.127		19.401	97.223	68.894	65.506	48	98.547	55.916	48
						18.3522							77.757	23.778			101.43		14.314	56.161	48	140.06	48	95.001	57.941	48.242
						18.409							160.253	4.3			122.691		0	18.514	57.127	93.523	48	69.555	73.278	76.134
						18.4659							97.896	23.959			119.73		8.161	44.724	48	67.108	96	54.998	65.609	61.603
						18.5227							108.695	39.902			95.23		46.755	69.397	48	89.425	96	68.375	50.87	38.395
						18.5795							105.693	73.984			66.22		5.671	60.882	48	96	48	83.166	62.475	19.626
						18.6363							80.216	19.162			48		0	50.087	48	56.62	123.384	71.489	57.373	71.226
						18.6931							91.201	48			83.56		9.608	36.548	32.349	87.865	108.148	48	48	51.332
						18.75							64.53	48			69.651		3.918	17.291	44.211	64.142	48	48	68.45	49.577
						18.8068							51.369	48			110.329		27.74	10.548	48	73.344	62.306	50.809	78.107	48
						18.8636							65.466	72.078			86.971		7.746	24.899	48	70.017	63.51	80.78	49.271	73.928
						18.9204							80.864	49.407			13.824		47.17	48	48	78.332	79.287	97.698	69.809	57.735
						18.9772							53.811	48			68.502		16.837	40.786	39.23	93.072	96	60.712	61.349	48
						19.034							50.092	48			85.01		17.947	45.815	14.958	51.947	135.242	48	52.018	48
						19.0909							67.099	96.294			79.348		25.682	42.686	57.095	52.417	103.93	82.251	85.885	48
						19.1477							130.546	96.56			71.204		22.227	38.624	41.825	66.69	48	126.254	79.083	48
						19.2045							90.261	103.502			138.695		22.566	32.079	85.344	85.921	48	92.442	96	72.451
						19.2613							104.422	58.897			162.2		6.233	3.602	50.062	96	71.933	74.119		125.637
						19.3181							85.391	50.522			97.415		30.185	11.62	48		96	69.447		77.477
						19.375							113.045	48.685			130.856		37.565	43.408	48		91.772	76.851		87.978
						19.4318							100.202	73.793			79.458		7.966	17.168	48		68.457	75.39		50.109
						19.4886							120.79	10.362			84.765		0	46.927	23.747		48	52.34		48
						19.5454							103.596	60.947			83.694		12.094	56.77	4.978		96	52.084		72
						19.6022							66.68	57.242			72.258		13.315	24.622	20.776		48	48		67.574
						19.659							88.213	54.129			51.37		24.64	11.885	48		79.613	63.319		55.256
						19.7159							68.535	76.932			85.068		48	2.62e-23	48.773		48	96		70.533
						19.7727							180.454	95.342			119.215				48.846		61.237	96		50.362
						19.8295							128.57	72.703			102.223				54.035		48	96		70.239
						19.8863							59.28	77.958			100.155				90.615		48	83.009		65.296
						19.9431							87.999	48			198.98				85.71		86.373	50.998		62.343
						19.9999							94.06	52.41			73.325				68.96		87.577	48.07		48
						20.0568							77.071	93.501			133.459				71.664		88.78	88.126		48
						20.1136							65.633	49.71			90.909				70.287		54.017	133.532		28.173
						20.1704							51.33	43.388			74.262				78.316		48	93.433		48
						20.2272							65.231	124.537			66.919				58.924		92.39	82.571		48
						20.284							48	76.967			104.212				112.8		48	48.671		53.14
						20.3409							49.672	48			97.526				107.662		49.203	67.958		48
						20.3977							50.557	48			72.187				53.328		48	102.478		48
						20.4545							10.617	46.847			93.291				98.693			48		48
						20.5113							48	48			73.759				67.38			48		48
						20.5681							52.117	57.685			48.675				81.853			55.9		47.128
						20.6249							48	80.534			78.659				66.695			101.107		52.361
						20.6818							42.305	50.479			93.411				48			96.932		55.577
						20.7386							1.567	96			60.159				48			113.113		72.679
						20.7954							18.748				88.209				50.213			114.651		22.475
						20.8522							24.064				55.207				59.116			52.596		54.274
						20.909							5.23				56.858				95.447			92.871		91.152
						20.9659							48				65.106				80.382			54.834		52.803
						21.0227							48				138.32				35.659			86.244		48.746
						21.0795							48				86.158				42.248			49.18		48.294
						21.1363							48				103.134				62.169			84.35		58.494
						21.1931							47.538				119.829				49.089			73.673		48
						21.2499							42.619				87.091				72.277			63.836		44.069
						21.3068							6.598				68.4				71.036			103.478		36.863
						21.3636							38.453				144.329				68.71			96		44.805
						21.4204							9.23				72.395				48					106.335
						21.4772							1.172				85.948				63.574					69.877
						21.534							20.056				120.419				85.204					38.585
						21.5909							45.864				115.601				48					57.906
						21.6477							24.835				110.686									65.03
						21.7045							17.845				48									48
						21.7613							3.487													48
						21.8181							47.168													55.184
						21.8749							39.864													50.077
						21.9318							43.872													52.705
						21.9886							44.978													48
						22.0454							5.562
						22.1022							41.651
						22.159							45.327
						22.2159							0
						22.2727							0
						22.3295							0
						22.3863							1.166
						22.4431							27.789
						22.4999							0
						22.5568							0
						22.6136							0.283
						22.6704							3.93
						22.7272							0
						22.784							1.395
						22.8409							46.91
						22.8977							10.547
						22.9545							0
						23.0113							0
						23.0681							0
						23.1249							0
						23.1818							0.225
						23.2386							14.732
						23.2954							0.268
						23.3522							40.365
						23.409							0
						23.4658							0
[truncated: 10 more columns]

## Sheet: Figure 4
Figure 4d					Figure 4e
DMSO	CHX				DMSO	Puromycin
0.436389	0				1.10224	0.795732
0.674344	0.759798				0.760863	0.780255
0.366528	0.860703				0.749817	0.786409
0.697425	1.0784				0.696976	0.73452
0.549623	0				0.836616	0.514094
1.13756	0.541426				0.746027	0.588074
2.09011	0.466671				0.803316	0.649643
0.754687	0.923162				0.752242	0.926516
1.36825	0.873804				1.18965	0.864042
1.03171	0.854427				1.42604	0.652176
1.355	0.875929				0.898916	0.647817
1.13415	0.539634				1.29698	0.739771
0.635985	1.75968				1.11047	0.76752
1.12044	0.594749				1.08795	0.737334
1.12238	0.28447				0.826612	0.707406
2.05205	0.633766				0.764198	0.529667
1.39172	0.466349				0.713584	0.727653
0.557225	0.630724				1.55237	0
0.585926	0.692713				1.05706	0.550704
1.05485	0.619713				1.62808	0
0.899365	1.16576				0.642753	0.701305
0.803602	0.664533				1.20108	0.757286
1.31645	0.765088				0.577279	0.266459
0.864241	0.746393				1.22027	0
0.884083	0.485582				1.10234	0.855442
0.775697	0.515644				0.993549	1.11633
0.790704	0.557754				0.968461	1.17852
1.54952	0.377702				1.02476	0
0.804779	0.776097				1.30676	0.708369
1.3215	0.478698				0.860242	0
3.51822	0.696043				0.893639	0
0.320309	1.38281				0.946453	0
0.488345	0.825767				1.07685	0.861198
0.746606	0.526158				0.864814	0
0.409468	0.780824				1.73566	0
0.640471	1.81401				0.433916	0.804071
0.941095	0.948722				1.27854	1.07069
0.445091	0.549427				1.11693	1.4538
0.524673	2.4509				0.921531	0
0.544882	0.635122				0.693464	2.8219
0.551202	0				1.63822	0.800381
1.04258	0.944253				1.27263	0.352397
1.01806	0.458595				0.408761	0.973848
3.1413	1.30487				0.821103	0.565463
0.397769	0					1.17298
1.94447	0.425328					1.42111
0.926446	0.447672					1.02868
0.747863	0.418816					0.557301
0.947813	0.412002					1.49311
0.577054	0.39879					1.17584
	0.453919
	0.284555
	0.541514
	0
	0.399958
	0.892226
	0.401114
	1.03218
	0.387207
	0
	0.701558
	0.412712
	0.512527
	0.31911
	0.750162

## Sheet: Figure 5
Figure 5b
	DMSO		Nocodazole
Repetition #	# of cells with streaks	Total # of cells	# of cells with streaks	Total # of cells
1	1	7	7	11
2	2	12	8	9
3	8	23	16	24

## Sheet: Figure 6
Figure 6b						Figure 6d
Non-ablated	Egg MT-ablated	mMB cap ablated					2-cell		4-cell		Non-cleaved
16.67		50				Not ablated	50	74.07	42.85	18.52	7.15	7.41
25	25	100				Egg MT-ablated	64.28	50	14.28	38.37	21.44	11.63
0	42.86	62.5				mMB cap-ablated	15.38	23.82	7.69	4.76	76.93	71.42
33.33	20	66.67

## Sheet: Figure S3
Figure S3c					Figure S3d
MKLP1 in RACGAP1	RACGAP1 in MKLP1				MKLP1 in CITK	CITK in MKLP1
0.5433	0.8306				0.0278	0.9184
0.9377	0.8226				0.0159	0.9594
0.1448	0.9744				0.219	0.567
0.4738	0.9847				0.0661	0.7405
0.532	0.9281				0.2286	0.467
0.3223	0.9834				0.097	0.734
0.2102	0.9763				0.0561	0.58
0.1428	0.625
0.7056	0.9884
0.559	0.7903

## Sheet: Figure S4
Figure S4c
	DMSO		5μM		10μM
Normal	3	8	0	0	0	0
Abnormal	0	0	6	17	11	9
Total cells	3	8	6	17	11	9

## Sheet: Figure S6
Figure S6a
	2-cell			4-cell			Non-cleaved
Not ablated	70	55	55	20	38	33	10	7	12
Cytoplasm-ablated	71	55		14	28		15	17
mMB cap-ablated	25	34	28	0.07	0.06	0.04	74.93	65.94	71.96
